# Supplementary material for: Comprehensive multiomics analysis of the effect of ginsenoside Rb1 on hyperlipidemia
Source: Aging (Albany NY). 2021 Mar 19;13(7):9732–47. doi: 10.18632/aging.202728 (PMC8064217; doi:10.18632/aging.202728)
Supplement: Supplementary Table 1 [file aging-13-202728-s002.xls]

## Sheet: Pathway in Lipodomics
Supplementary Table 1. Results of KEGG and MetaboAnalyst enrichment analysis in Lipodomics.
Pathway	Model	Group	Total	Hits	Compound	Raw p	-ln(p)	Impact
Glycerophospholipid metabolism	POS	Control vs Model	30	3	cpd:C00157 Phosphatidylcholine cpd:C00350 Phosphatidylethanolamine cpd:C04230 1-Acyl-sn-glycero-3-phosphocholine	0.00096001	6.9486	0.275
Ether lipid metabolism	POS	Control vs Model	5	1	cpd:C04317 1-Organyl-2-lyso-sn-glycero-3-phosphocholine	0.035208	3.3465	0
Linoleic acid metabolism	POS	Rb1 vs Model	5	1	cpd:C00157 Phosphatidylcholine	0.0071225	4.9445	0
alpha-Linolenic acid metabolism	POS	Rb1 vs Model	9	1	cpd:C00157 Phosphatidylcholine	0.012802	4.3581	0
Glycerophospholipid metabolism	POS	Rb1 vs Model	30	1	cpd:C00157 Phosphatidylcholine	0.042353	3.1617	0.13889
Glycerophospholipid metabolism	NEG	Control vs Model	30	3	cpd:C00157 Phosphatidylcholine cpd:C00350 Phosphatidylethanolamine cpd:C04230 1-Acyl-sn-glycero-3-phosphocholine	3.49e-05	10.262	0.275
Linoleic acid metabolism	NEG	Control vs Model	5	1	cpd:C00157 Phosphatidylcholine	0.014204	4.2542	0
alpha-Linolenic acid metabolism	NEG	Control vs Model	9	1	cpd:C00157 Phosphatidylcholine	0.025458	3.6707	0
Glycosylphosphatidylinositol(GPI)-anchor biosynthesis	NEG	Control vs Model	14	1	cpd:C00350 Phosphatidylethanolamine	0.03939	3.2342	0.0439
Linoleic acid metabolism	NEG	Rb1 vs Model	5	1	cpd:C00157 Phosphatidylcholine	0.0035663	5.6362	0
alpha-Linolenic acid metabolism	NEG	Rb1 vs Model	9	1	cpd:C00157 Phosphatidylcholine	0.0064194	5.0484	0
Glycerophospholipid metabolism	NEG	Rb1 vs Model	30	1	cpd:C00157 Phosphatidylcholine	0.021398	3.8445	0.13889
Arachidonic acid metabolism	NEG	Rb1 vs Model	36	1	cpd:C00157 Phosphatidylcholine	0.025678	3.6621	0
