# Supplementary material for: Comprehensive multiomics analysis of the effect of ginsenoside Rb1 on hyperlipidemia
Source: Aging (Albany NY). 2021 Mar 19;13(7):9732–47. doi: 10.18632/aging.202728 (PMC8064217; doi:10.18632/aging.202728)
Supplement: Supplementary Table 2 [file aging-13-202728-s003.xls]

## Sheet: GO-model vs control
Supplementary Table 2. Main enriched GO terms between model and control groups in transcriptome.
GOID	GOTerm	Ontology Source	Term PValue	Term PValue Corrected with Bonferroni step down	% Associated Genes	Nr. Genes	Associated Genes Found
GO:0032403	protein complex binding	GO_MolecularFunction-GOA_23.02.2017_10h01	9.23088e-05	0.0470775	4.82234	38	[C1qtnf1, Cd74, Cdh17, Esm1, Fam178a, Fbln5, Fyb, Git1, Gmfg, Hrg, Hspa8, Igbp1, Lrrk2, Micall2, Mtss1, Myh10, Myo18a, Mysm1, Nck2, Nckap1, Nckap1l, Ncor2, P4hb, Phip, Pik3r1, Pspc1, Rprd1b, Shroom3, Slf1, Spdl1, Syne1, Syne2, Thra, Tln2, Tsn, Uqcrfs1, Vt
GO:0015630	microtubule cytoskeleton	GO_CellularComponent-GOA_23.02.2017_10h01	8.89101e-05	0.045433	4.42638	49	[Bbof1, Bbs7, Casc1, Ccdc38, Ccdc88c, Cchcr1, Cep128, Cep76, Cep83, Chp1, Cntrl, Ctdp1, Ctnnb1, Cttn, Ddx11, Dnaja1, Eml6, Fsd1, Ftcd, Gtse1, Haus7, Hecw2, Igbp1, Kbtbd8, Lrpprc, Mms19, Myh10, Nup107, Odf2, Phip, Poc1b, Polr2c, Ppp4r2, Rab11fip5, Ranbp3,
GO:0007063	regulation of sister chromatid cohesion	GO_BiologicalProcess-GOA_23.02.2017_10h01	7.90608e-05	0.0404791	26.3158	5	[Atrx, Ctnnb1, Ddx11, Fam178a, Slf1]
GO:0050994	regulation of lipid catabolic process	GO_BiologicalProcess-GOA_23.02.2017_10h01	7.54181e-05	0.0386895	14.0351	8	[Apoa2, Apoa5, Crtc3, Fabp1, Fgf21, Gpld1, Pik3cg, Thra]
GO:0042592	homeostatic process	GO_BiologicalProcess-GOA_23.02.2017_10h01	7.44023e-05	0.0382428	4.02161	67	[Abcg8, Acox1, Apoa2, Apoa5, Asxl1, Atrx, C1qtnf1, Ccl19, Cd74, Cherp, Chp1, Clns1a, Col4a3bp, Crtc3, Ctnnb1, Cyb5r4, Dclre1a, Dclre1c, Ern1, Fgf21, Gcgr, Golt1a, Gpld1, Hmgcr, Hmox2, Large1, Lgr4, Lrrk2, Mcur1, Mecom, Mtch2, Mtss1, Nckap1l, Ncor2, Nucb2,
GO:0080135	regulation of cellular response to stress	GO_BiologicalProcess-GOA_23.02.2017_10h01	7.24131e-05	0.0372927	5.39568	30	[Ccl19, Cd74, Ctnnb1, Cxcl12, Ddx11, Dnaja1, Eif2ak3, Ern1, Fam168a, Fam178a, Fbln5, Hmgcr, Igbp1, Lrrk2, Mecom, Mink1, Mtch2, Nck2, Ncoa7, Nsmce4a, Ogg1, P4hb, Pik3r1, Ppp4r2, Rasgrp1, Slc30a10, Slf1, Tlr4, Trpm2, Usp25]
GO:0007010	cytoskeleton organization	GO_BiologicalProcess-GOA_23.02.2017_10h01	6.21362e-05	0.0320623	4.42177	52	[Abr, Atrx, Cc2d2a, Ccdc88c, Cep76, Chp1, Cobl, Ctnnb1, Cttn, Dixdc1, Dnaaf5, Eln, Fbxw5, Fryl, Ftcd, Gmfg, Grb2, Haus7, Hax1, Hrg, Iqsec2, Lmod1, Micall2, Mink1, Msrb2, Mtss1, Myh10, Myo18a, Nck2, Nckap1, Nckap1l, Odf2, Phip, Phldb1, Pik3r1, Pkd1, Prox1,
GO:0044248	cellular catabolic process	GO_BiologicalProcess-GOA_23.02.2017_10h01	5.88025e-05	0.0304009	4.07407	66	[Abcd3, Acadm, Acox1, Apoa2, Apoa5, Atg16l2, Bbs7, Blvra, Cnot1, Cttn, Cul4b, Eci2, Esd, Fabp1, Faf2, Fbxo8, Fbxw5, Fgf21, Ftcd, Galk2, Gla, Gpld1, Gpt, Hexa, Hmox2, Hspa8, Hspbp1, Inpp4a, Itgb4, Kbtbd8, Lars, Lgals8, Lix1l, Lrpprc, Lrrk2, Lta4h, Ncf2, Nk
GO:0044262	cellular carbohydrate metabolic process	GO_BiologicalProcess-GOA_23.02.2017_10h01	5.70442e-05	0.0295489	6.93431	19	[Acadm, C1qtnf1, Dusp12, Galk2, Gcgr, Gne, Gpld1, Gys1, Idh2, Lcmt1, Midn, Mtch2, Per2, Phka1, Ppp1r3b, Pygb, Slc35b4, Slc45a3, Stk4]
GO:0006461	protein complex assembly	GO_BiologicalProcess-GOA_23.02.2017_10h01	5.17731e-05	0.0268702	4.44638	51	[Aars2, Acmsd, Ankrd27, C1qtnf1, Ccdc88c, Cd74, Cdh17, Chp1, Cobl, Cox14, Crtc3, Ctnnb1, Cttn, Dnaaf5, Eif2ak3, Eif4h, Eln, Fam178a, Gmfg, Grb2, Hax1, Higd2a, Hmgcr, Hrg, Immp1l, Lcmt1, Lmod1, Lrrk2, Malt1, Micall2, Msrb2, Mtss1, Nck2, Nckap1, Nckap1l, Nu
GO:0044429	mitochondrial part	GO_CellularComponent-GOA_23.02.2017_10h01	5.01442e-05	0.026075	4.7836	42	[Abcd3, Acadm, Acot2, Agk, Apool, Chchd1, Chchd7, Cox14, Cox6a1, Crls1, Dtymk, Fars2, Fbxl4, Gadd45gip1, Galk2, Hax1, Higd2a, Idh2, Immp1l, Lrpprc, Lrrk2, Mavs, Mcur1, Mrps23, Mrps5, Mtch2, Oma1, Pdhb, Polrmt, Ppox, Rab11fip5, Sarm1, Sdhc, Shmt2, Slc25a22
GO:0005739	mitochondrion	GO_CellularComponent-GOA_23.02.2017_10h01	4.11583e-05	0.0214435	4.02723	71	[Aars2, Abcd3, Acadm, Acot2, Acox1, Agk, Apool, Arglu1, Bola3, Chchd1, Chchd7, Cmpk2, Col4a3bp, Cox14, Cox6a1, Crls1, Dbi, Dnaja1, Dtymk, Eci2, Eln, Ern1, Fars2, Fbxl4, Gadd45gip1, Galk2, Gars, Gbas, Hax1, Higd2a, Idh2, Immp1l, Isoc2b, Kyat3, Lrpprc, Lrrk
GO:0006605	protein targeting	GO_BiologicalProcess-GOA_23.02.2017_10h01	3.74895e-05	0.0195695	5.41455	32	[Ccl19, Cherp, Chp1, Ddx58, Dph6, Exoc4, Golga1, Golga4, Hspa8, Huwe1, Immp1l, Ipo9, Lars, Lrrk2, Mavs, Micall2, Nkd2, Nup107, Ogg1, Pex19, Phip, Pik3r1, Pkd1, Ranbp3, Rpl28, Ruvbl1, Thra, Timm10, Tlr4, Tmco6, Ywhae, Zfand2b]
GO:0044451	nucleoplasm part	GO_CellularComponent-GOA_23.02.2017_10h01	2.52907e-05	0.013227	4.63138	49	[Acadm, Atrx, Cpsf1, Crnkl1, Ctdp1, Dpy30, Fbxl4, Gemin2, Gtf2a1, Gtf2e2, Lars, Mecom, Med20, Med29, Ncor2, Nsmce4a, Nufip1, Ogg1, Orc3, Pcnp, Phf20, Pias2, Polr2c, Polr2l, Prdm15, Prpf40b, Pspc1, Rbm14, Rbm4, Rnf2, Rnf6, Rprd1b, Ruvbl1, Setd1b, Sfmbt2, S
GO:0006563	L-serine metabolic process	GO_BiologicalProcess-GOA_23.02.2017_10h01	2.38876e-05	0.0125171	50	4	[Psat1, Psph, Sds, Shmt2]
GO:0072594	establishment of protein localization to organelle	GO_BiologicalProcess-GOA_23.02.2017_10h01	1.52225e-05	0.00799182	5.74074	31	[Ccl19, Cherp, Chp1, Ddx58, Dnaja1, Dph6, Golga1, Golga4, Hspa8, Huwe1, Immp1l, Ipo9, Lars, Lrrk2, Mavs, Micall2, Mtch2, Nup107, Ogg1, Pex19, Phip, Pik3r1, Pkd1, Ranbp3, Rpl28, Ruvbl1, Thra, Timm10, Tlr4, Tmco6, Zfand2b]
GO:0019752	carboxylic acid metabolic process	GO_BiologicalProcess-GOA_23.02.2017_10h01	1.31004e-05	0.00689084	5.04103	43	[Aars2, Abcd3, Acadm, Acmsd, Acot2, Acox1, Apoa2, Apoa5, Asns, Aspa, Btd, Cd74, Eci2, Eif2ak3, Fabp1, Fars2, Ftcd, Gars, Gmps, Gne, Gpt, Idh2, Kyat3, Lars, Lta4h, Mri1, Mtch2, P4hb, Pdhb, Pdxdc1, Per2, Por, Prox1, Psat1, Psph, Ptges2, Qprt, Sc5d, Sdhc, Sd
GO:0044711	single-organism biosynthetic process	GO_BiologicalProcess-GOA_23.02.2017_10h01	1.15518e-05	0.00608779	4.53441	56	[Abcd3, Acadm, Agk, Alg11, Apoa2, Apoa5, Asns, Cd74, Cmpk2, Crls1, Ctnnb1, Cyp51, Dtymk, Ebp, Errfi1, Extl1, Gars, Gbas, Gmps, Gpld1, Gucy1a2, Gys1, Hmgcr, Hmgcs1, Idh2, Inpp4a, Lta4h, Mri1, P2ry13, Pdhb, Per2, Pigc, Pik3cg, Pik3r1, Plcg2, Pnpo, Por, Ppox
GO:0033554	cellular response to stress	GO_BiologicalProcess-GOA_23.02.2017_10h01	8.65848e-06	0.00457168	4.26452	69	[Apoa5, Asns, Atrx, Ccdc88c, Ccl19, Cd74, Cdkn2aip, Col4a3bp, Ctnnb1, Cul4b, Cxcl12, Dclre1a, Dclre1c, Ddx11, Dnaja1, Eif2ak3, Ern1, Errfi1, Fabp1, Faf2, Fam168a, Fam178a, Fbln5, Fgf21, Grb2, Hif1an, Hmgcr, Hnrnpl, Huwe1, Igbp1, Lars, Lrrk2, Mecom, Mink1,
GO:0006082	organic acid metabolic process	GO_BiologicalProcess-GOA_23.02.2017_10h01	2.30017e-06	0.00121679	5.13369	48	[Aars2, Abcd3, Acadm, Acmsd, Acot2, Acox1, Apoa2, Apoa5, Asns, Aspa, Btd, Cd74, Ctnnb1, Eci2, Eif2ak3, Extl1, Fabp1, Fars2, Ftcd, Gars, Gmps, Gne, Gpt, Idh2, Inpp4a, Kyat3, Lars, Lta4h, Mri1, Mtch2, P4hb, Pdhb, Pdxdc1, Per2, Por, Prox1, Psat1, Psph, Ptges
GO:0033043	regulation of organelle organization	GO_BiologicalProcess-GOA_23.02.2017_10h01	2.03484e-06	0.00107846	4.84848	56	[Adprhl1, Ankrd27, Atrx, Cep76, Cnot1, Ctnnb1, Cttn, Ddx11, Dixdc1, Dph6, Eln, Fam178a, Fbxw5, Gmfg, Grb2, Hax1, Hecw2, Hrg, Huwe1, Lcmt1, Lmod1, Lrrk2, Mavs, Micall2, Mtss1, Nck2, Nckap1, Nckap1l, Odf2, Oma1, Phip, Phldb1, Pik3r1, Pkd1, Prox1, Rad50, Ran
GO:0031090	organelle membrane	GO_CellularComponent-GOA_23.02.2017_10h01	1.54638e-06	0.000821125	4.02713	95	[Abcc4, Abcd3, Acox1, Agk, Akap6, Ankrd27, Ap1g2, Ap3m1, Apeh, Apool, Arhgap32, Atg16l2, Atp8a1, Bbs7, Cherp, Chp1, Clcn6, Cnot1, Cox14, Cox6a1, Cptp, Crls1, Cyp51, Ern1, Ftcd, Galk2, Galnt10, Golga1, Golga4, Golt1a, Gpld1, Grb2, Hax1, Higd2a, Hmgcr, Hrg,
GO:0006886	intracellular protein transport	GO_BiologicalProcess-GOA_23.02.2017_10h01	1.47462e-06	0.0007845	5.08647	50	[Adprhl1, Ap1g2, Ap2a2, Ap3m1, Cchcr1, Ccl19, Cd74, Cherp, Chp1, Cse1l, Ctdspl2, Cttn, Ddx58, Dph6, Exoc4, Faf2, Golga1, Golga4, Hspa8, Huwe1, Immp1l, Ipo9, Lars, Lrrk2, Mavs, Micall2, Nkd2, Nup107, Nupl2, Ogg1, Pex19, Phip, Pik3r1, Pkd1, Ranbp3, Rpl28, R
GO:0034622	cellular macromolecular complex assembly	GO_BiologicalProcess-GOA_23.02.2017_10h01	1.13531e-06	0.000605118	5.31674	47	[Aars2, Ankrd27, Atrx, Bdp1, Cabin1, Clns1a, Cnot1, Cobl, Cox14, Crnkl1, Cttn, Dnaaf5, Eif4h, Eln, Gemin2, Gmfg, Grb2, Hax1, Higd2a, Immp1l, Itgb3bp, Lmod1, Micall2, Msrb2, Mtss1, Nck2, Nckap1, Nckap1l, Nufip1, Nup107, Orc3, Psmg4, Rbm5, Rc3h1, Rps17, Rps
GO:0022607	cellular component assembly	GO_BiologicalProcess-GOA_23.02.2017_10h01	7.5115e-07	0.000401114	4.05239	99	[Aars2, Abcc4, Acmsd, Ankrd27, Apoa2, Apoa5, Atg16l2, Atrx, Bbof1, Bbs7, Bdp1, C1qtnf1, Cabin1, Cc2d2a, Ccdc88c, Ccl19, Cd74, Cdh17, Cep76, Cep83, Chp1, Clns1a, Cnot1, Cobl, Cox14, Crnkl1, Crtc3, Ctnnb1, Cttn, Dnaaf5, Eif2ak3, Eif4h, Eln, Fam178a, Fbln5,
GO:0033365	protein localization to organelle	GO_BiologicalProcess-GOA_23.02.2017_10h01	6.8171e-07	0.000364715	5.54187	45	[Atrx, Cc2d2a, Ccl19, Cep83, Cherp, Chp1, Ddx58, Dnaja1, Dph6, Eif2ak3, Fam178a, Golga1, Golga4, Hspa8, Huwe1, Immp1l, Ipo9, Kdelr2, Lars, Lrrk2, Mavs, Micall2, Mtch2, Nup107, Ogg1, Pex19, Phip, Pik3r1, Pkd1, Ptges2, Ranbp3, Rpl28, Rpl3, Ruvbl1, Slf1, Spd
GO:0034613	cellular protein localization	GO_BiologicalProcess-GOA_23.02.2017_10h01	5.56573e-07	0.000298323	4.53115	72	[Adprhl1, Ap1g2, Ap2a2, Ap3m1, Atrx, Cc2d2a, Cchcr1, Ccl19, Cd74, Cep83, Cherp, Chp1, Cse1l, Ctdspl2, Ctnnb1, Cttn, Ddx58, Dnaja1, Dph6, Eif2ak3, Exoc4, Faf2, Fam178a, Fbln5, Fyb, Golga1, Golga4, Hspa8, Huwe1, Immp1l, Ipo9, Kdelr2, Lars, Lrrk2, Mavs, Mica
GO:0043933	macromolecular complex subunit organization	GO_BiologicalProcess-GOA_23.02.2017_10h01	3.81453e-07	0.00020484	4.51807	75	[Aars2, Acmsd, Ankrd27, Apoa2, Apoa5, Atrx, Bdp1, C1qtnf1, Cabin1, Ccdc88c, Cd74, Cdh17, Chp1, Clns1a, Cnot1, Cobl, Cox14, Crnkl1, Crtc3, Ctnnb1, Cttn, Dnaaf5, Eif2ak3, Eif4h, Eln, Fam178a, Gemin2, Gmfg, Grb2, Hax1, Higd2a, Hmgcr, Hrg, Hspa8, Immp1l, Itgb
GO:1901564	organonitrogen compound metabolic process	GO_BiologicalProcess-GOA_23.02.2017_10h01	3.00051e-07	0.000161427	4.32161	86	[Aars2, Acadm, Acmsd, Acox1, Agk, Apeh, Apoa2, Apoa5, Asns, Blvra, Btd, Chchd1, Cmpk2, Cnot1, Col4a3bp, Cox6a1, Cyb5r4, Dbi, Dtymk, Eif2ak3, Eif4h, Extl1, Fars2, Ftcd, Gadd45gip1, Gars, Gbas, Gla, Gmps, Gpld1, Gpt, Gucy1a2, Hexa, Hmgcr, Hmox2, Hnrnpl, Hsp
GO:0046907	intracellular transport	GO_BiologicalProcess-GOA_23.02.2017_10h01	2.96337e-07	0.000159726	4.74504	67	[Adprhl1, Ankrd27, Ap1g2, Ap2a2, Ap3m1, Bbs7, Ccdc88c, Cchcr1, Ccl19, Cd74, Cherp, Chp1, Col4a3bp, Cse1l, Ctdspl2, Ctnnb1, Cttn, Ddx58, Dph6, Exoc4, Faf2, Golga1, Golga4, Hspa8, Huwe1, Il4ra, Immp1l, Ipo9, Lars, Lrrk2, Malt1, Mavs, Micall2, Nkd2, Nup107,
GO:0031967	organelle envelope	GO_CellularComponent-GOA_23.02.2017_10h01	2.24667e-07	0.00012132	5.19358	55	[Abcd3, Agk, Akap6, Apeh, Apool, Chchd7, Cox14, Cox6a1, Cptp, Crls1, Dtymk, Ebp, Ern1, Fbxl4, Galk2, Hax1, Higd2a, Idh2, Immp1l, Lrpprc, Lrrk2, Mavs, Mcur1, Mrps23, Mtch2, Myof, Nucb2, Nup107, Nupl2, Oit3, Oma1, Pgrmc2, Phf20, Ppox, Prickle2, Rab11fip5, R
GO:0065003	macromolecular complex assembly	GO_BiologicalProcess-GOA_23.02.2017_10h01	9.12525e-08	4.93676e-05	4.7683	71	[Aars2, Acmsd, Ankrd27, Apoa2, Apoa5, Atrx, Bdp1, C1qtnf1, Cabin1, Ccdc88c, Cd74, Cdh17, Chp1, Clns1a, Cnot1, Cobl, Cox14, Crnkl1, Crtc3, Ctnnb1, Cttn, Dnaaf5, Eif2ak3, Eif4h, Eln, Fam178a, Gemin2, Gmfg, Grb2, Hax1, Higd2a, Hmgcr, Hrg, Immp1l, Itgb3bp, Lc
GO:0045184	establishment of protein localization	GO_BiologicalProcess-GOA_23.02.2017_10h01	8.46593e-08	4.58853e-05	4.45135	86	[Adprhl1, Ankrd27, Ap1g2, Ap2a2, Ap3m1, Apoa2, Atg16l2, Bbs7, Cchcr1, Ccl19, Cd74, Cherp, Chp1, Cse1l, Ctdspl2, Cttn, Cyb5r4, Ddx58, Dnaja1, Dph6, Exoc4, Faf2, Golga1, Golga4, Golt1a, Gpld1, Hmgcr, Hspa8, Huwe1, Ica1, Idh2, Il17rc, Il4ra, Immp1l, Ipo9, Kd
GO:0044281	small molecule metabolic process	GO_BiologicalProcess-GOA_23.02.2017_10h01	6.39522e-08	3.4726e-05	4.53057	83	[Aars2, Abcd3, Acadm, Acmsd, Acot2, Acox1, Apoa2, Apoa5, Asns, Aspa, Btd, C1qtnf1, Car8, Cd74, Cmpk2, Cox6a1, Ctnnb1, Cyp51, Dtymk, Dusp12, Ebp, Eci2, Eif2ak3, Esd, Extl1, Fabp1, Fars2, Ftcd, Gadd45gip1, Galk2, Gars, Gbas, Gcgr, Gmps, Gne, Gpld1, Gpt, Guc
GO:0015833	peptide transport	GO_BiologicalProcess-GOA_23.02.2017_10h01	6.14762e-08	3.34431e-05	4.538	83	[Adprhl1, Ankrd27, Ap1g2, Ap2a2, Ap3m1, Apoa2, Atg16l2, Bbs7, Cchcr1, Ccl19, Cd74, Cdh17, Cherp, Chp1, Cse1l, Ctdspl2, Cttn, Cyb5r4, Ddx58, Dnaja1, Dph6, Exoc4, Faf2, Golga1, Golga4, Golt1a, Gpld1, Hmgcr, Hspa8, Huwe1, Ica1, Idh2, Il17rc, Il4ra, Immp1l, I
GO:0019899	enzyme binding	GO_MolecularFunction-GOA_23.02.2017_10h01	5.8035e-08	3.16291e-05	4.51407	85	[Adprhl1, Akap6, Ankrd27, Ap2a2, Ap3m1, Apoa5, Cd74, Chp1, Cpsf1, Cse1l, Cstb, Ctnnb1, Cul4b, Dcun1d1, Ddx58, Dnaja1, Dusp12, Eif2ak3, Ern1, Errfi1, Exoc4, Faf2, Fam178a, Fbxw5, Golga4, Grb2, Gys1, Haus7, Hmgcr, Hspa8, Igbp1, Ipo9, Lrpprc, Lrrk2, Malt1, M
GO:0051649	establishment of localization in cell	GO_BiologicalProcess-GOA_23.02.2017_10h01	3.29011e-08	1.7964e-05	4.63652	81	[Adprhl1, Ankrd27, Ap1g2, Ap2a2, Ap3m1, Bbs7, Ccdc88c, Cchcr1, Ccl19, Cd74, Cep83, Cherp, Chp1, Col4a3bp, Cse1l, Ctdspl2, Ctnnb1, Cttn, Ddx58, Dph6, Exoc4, Faf2, Golga1, Golga4, Gpld1, Hmgcr, Hspa8, Huwe1, Ica1, Il4ra, Immp1l, Ipo9, Lars, Lrrk2, Malt1, Ma
GO:0042886	amide transport	GO_BiologicalProcess-GOA_23.02.2017_10h01	2.76616e-08	1.51309e-05	4.59957	85	[Adprhl1, Ankrd27, Ap1g2, Ap2a2, Ap3m1, Apoa2, Atg16l2, Bbs7, Cchcr1, Ccl19, Cd74, Cdh17, Cherp, Chp1, Col4a3bp, Cptp, Cse1l, Ctdspl2, Cttn, Cyb5r4, Ddx58, Dnaja1, Dph6, Exoc4, Faf2, Golga1, Golga4, Golt1a, Gpld1, Hmgcr, Hspa8, Huwe1, Ica1, Idh2, Il17rc,
GO:1902589	single-organism organelle organization	GO_BiologicalProcess-GOA_23.02.2017_10h01	2.54809e-08	1.39636e-05	4.80769	75	[Abcc4, Abr, Adprhl1, Ankrd27, Apool, Atrx, Bbof1, Bbs7, Cc2d2a, Ccdc88c, Cep83, Chp1, Cobl, Col4a3bp, Ctnnb1, Cttn, Ddx11, Dixdc1, Dnaaf5, Eln, Fam178a, Fryl, Gmfg, Grb2, Hax1, Hecw2, Hrg, Iqsec2, Lcmt1, Lix1l, Lmod1, Micall2, Mink1, Msrb2, Mtch2, Mtss1,
GO:0008104	protein localization	GO_BiologicalProcess-GOA_23.02.2017_10h01	1.49125e-08	8.18695e-06	4.30328	105	[Adprhl1, Ankrd27, Ap1g2, Ap2a2, Ap3m1, Apoa2, Atg16l2, Atrx, Bbs7, Cc2d2a, Cchcr1, Ccl19, Cd74, Cep83, Cherp, Chp1, Cse1l, Ctdspl2, Ctnnb1, Cttn, Cyb5r4, Ddx58, Dnaja1, Dph6, Eif2ak3, Exoc4, Faf2, Fam178a, Fbln5, Fyb, Golga1, Golga4, Golt1a, Gpld1, Hmgcr
GO:0071705	nitrogen compound transport	GO_BiologicalProcess-GOA_23.02.2017_10h01	1.10444e-08	6.07443e-06	4.46429	95	[Adprhl1, Ankrd27, Ap1g2, Ap2a2, Ap3m1, Apoa2, Atg16l2, Bbs7, Cchcr1, Ccl19, Cd74, Cdh17, Cherp, Chp1, Col4a3bp, Cptp, Cse1l, Ctdspl2, Cttn, Cxcl12, Cyb5r4, Ddx58, Dnaja1, Dph6, Exoc4, Faf2, Golga1, Golga4, Golt1a, Gpld1, Hmgcr, Hrg, Hspa8, Huwe1, Ica1, I
GO:0003723	RNA binding	GO_MolecularFunction-GOA_23.02.2017_10h01	4.80415e-09	2.64709e-06	4.90683	79	[AI837181, Aars2, Apeh, Cdkn2aip, Chchd1, Cherp, Clns1a, Cnot1, Cpsf1, Crnkl1, Cstb, Ddx11, Ddx58, Dhx16, Dnajc17, Eif2ak3, Eif4h, Fars2, Grb2, Gtf2e2, Hnrnpl, Hspa8, Huwe1, Kri1, Kyat3, Lrpprc, Lta4h, Mrps23, Mrps5, Myo18a, Naa15, Nifk, Nova2, Nqo1, Nufi
GO:0005654	nucleoplasm	GO_CellularComponent-GOA_23.02.2017_10h01	4.15802e-09	2.29523e-06	4.28193	113	[Acadm, Acox1, Arglu1, Arhgap32, Atg16l2, Atrx, Bbx, Bcorl1, Btbd8, Cabin1, Cdca7, Cdkn2aip, Cdkn2aipnl, Chchd1, Clns1a, Col4a3bp, Cpsf1, Crnkl1, Crtc3, Cse1l, Ctdp1, Ctdspl2, Cul4b, Dclre1a, Dclre1c, Ddi2, Dhx16, Dpy30, Eci2, Fabp1, Fbxl4, Gemin2, Grb2,
GO:0005829	cytosol	GO_CellularComponent-GOA_23.02.2017_10h01	4.12992e-09	2.28385e-06	4.04223	134	[Abr, Acmsd, Akt1s1, Ankrd27, Apeh, Apoa2, Asns, Aspa, Bbx, Bex3, Blvra, C1qtnf1, Cabin1, Ccdc88c, Cchcr1, Cdca7, Chchd1, Chp1, Clns1a, Cnot1, Cntrl, Col4a3bp, Colec10, Cptp, Crlf3, Crtc3, Cse1l, Cstb, Ctnnb1, Cttn, Cul4b, Dcun1d1, Ddi2, Ddx58, Dixdc1, Dn
GO:0006996	organelle organization	GO_BiologicalProcess-GOA_23.02.2017_10h01	2.21049e-09	1.22461e-06	4.00572	140	[Aars2, Abcc4, Abcd3, Abr, Acox1, Adprhl1, Ankrd27, Apool, Asxl1, Atg16l2, Atp8a1, Atrx, Bbof1, Bbs7, Bcorl1, Cabin1, Cc2d2a, Ccdc88c, Cep76, Cep83, Chp1, Cnot1, Cobl, Col4a3bp, Cox14, Ctdp1, Ctnnb1, Cttn, Cul4b, Dclre1a, Dclre1c, Ddx11, Dixdc1, Dnaaf5, D
GO:0071702	organic substance transport	GO_BiologicalProcess-GOA_23.02.2017_10h01	1.07231e-09	5.95133e-07	4.4159	110	[Abcc4, Abcd3, Abcg8, Adprhl1, Ankrd27, Ap1g2, Ap2a2, Ap3m1, Apoa2, Apoa5, Atg16l2, Atp8a1, Bbs7, C1qtnf1, Cchcr1, Ccl19, Cd74, Cdh17, Cherp, Chp1, Col4a3bp, Cptp, Cse1l, Ctdspl2, Cttn, Cxcl12, Cyb5r4, Ddx58, Dnaja1, Dph6, Exoc4, Fabp1, Faf2, Fgf21, Golga
GO:0070013	intracellular organelle lumen	GO_CellularComponent-GOA_23.02.2017_10h01	9.02267e-11	5.01661e-08	4.02977	157	[Abcd3, Acadm, Acot2, Acox1, Arglu1, Arhgap32, Asxl1, Atg16l2, Atrx, Bbx, Bcorl1, Btbd8, Btd, Cabin1, Calr3, Cdca7, Cdkn2aip, Cdkn2aipnl, Chchd1, Chchd7, Clns1a, Col4a3bp, Cpsf1, Crnkl1, Crtc3, Cse1l, Cstb, Ctdp1, Ctdspl2, Ctnnb1, Cul4b, Dclre1a, Dclre1c,
GO:0044428	nuclear part	GO_CellularComponent-GOA_23.02.2017_10h01	2.31073e-11	1.28708e-08	4.0922	158	[Acadm, Acox1, Akap6, Apeh, Arglu1, Arhgap32, Asxl1, Atg16l2, Atrx, Bbx, Bcorl1, Bdp1, Btbd8, Btd, Cabin1, Cdca7, Cdkn2aip, Cdkn2aipnl, Chchd1, Clns1a, Col4a3bp, Cpsf1, Cptp, Crnkl1, Crtc3, Cse1l, Cstb, Ctdp1, Ctdspl2, Ctnnb1, Cul4b, Dclre1a, Dclre1c, Ddi
