# Supplementary material for: Comprehensive multiomics analysis of the effect of ginsenoside Rb1 on hyperlipidemia
Source: Aging (Albany NY). 2021 Mar 19;13(7):9732–47. doi: 10.18632/aging.202728 (PMC8064217; doi:10.18632/aging.202728)
Supplement: Supplementary Table 3 [file aging-13-202728-s004.xls]

## Sheet: GO-Rb1 vs model
Supplementary Table 3. Main enriched GO terms between Rb1 and model groups in transcriptome.
GOID	GOTerm	Ontology Source	Term PValue	Term PValue Corrected with Bonferroni step down	% Associated Genes	Nr. Genes	Associated Genes Found
GO:0006259	DNA metabolic process	GO_BiologicalProcess-GOA_23.02.2017_10h01	1.12573e-06	0.000289312	4.3628	38	[Alkbh3, Asf1a, Atrx, Cdan1, Chek1, Cinp, Dot1l, Ezh2, Hmga1, Hspd1, Huwe1, Icosl, Id3, Jmy, Lig3, Lonp1, Mcmbp, Mcrs1, Meioc, Mki67, Mlh1, Pds5b, Pms1, Pola2, Psmd14, Rad52, Rev1, Rps27l, Spidr, Supt6, Taok1, Tnfsf13, Top3a, Usp37, Vprbp, Wdr48, Xpa, Zranb3]
GO:0006281	DNA repair	GO_BiologicalProcess-GOA_23.02.2017_10h01	2.02226e-06	0.000517697	5.56845	24	[Alkbh3, Asf1a, Atrx, Chek1, Cinp, Dot1l, Hmga1, Huwe1, Jmy, Lig3, Mcrs1, Meioc, Mlh1, Pds5b, Pms1, Psmd14, Rad52, Rev1, Rps27l, Spidr, Taok1, Wdr48, Xpa, Zranb3]
GO:0006974	cellular response to DNA damage stimulus	GO_BiologicalProcess-GOA_23.02.2017_10h01	3.92968e-05	0.0100207	4.22741	29	[Alkbh3, Asf1a, Atrx, Chek1, Cinp, Dnaja1, Dot1l, Ei24, Hmga1, Huwe1, Jmy, Lig3, Mcrs1, Mcts1, Meioc, Mlh1, Pds5b, Pms1, Psmd14, Rad52, Rev1, Rps27l, Spidr, Tank, Taok1, Wdr48, Xpa, Zbtb40, Zranb3]
GO:0034755	iron ion transmembrane transport	GO_BiologicalProcess-GOA_23.02.2017_10h01	0.000101044	0.0256653	28.5714	4	[Atp7a, Hamp, Slc25a37, Slc40a1]
GO:0006310	DNA recombination	GO_BiologicalProcess-GOA_23.02.2017_10h01	0.000109042	0.0275875	6.08696	14	[Chek1, Hspd1, Icosl, Lig3, Mcrs1, Mlh1, Psmd14, Rad52, Spidr, Supt6, Tnfsf13, Vprbp, Wdr48, Zranb3]
GO:0000280	nuclear division	GO_BiologicalProcess-GOA_23.02.2017_10h01	0.000155968	0.0393038	4.19463	25	[Aspm, Atrx, Cep192, Chek1, Dctn2, Fsd1, Hecw2, Klhl21, Map10, Mapre2, Mcmbp, Meioc, Mki67, Mlh1, Pde3a, Pds5b, Phip, Pkd1, Ran, Spire1, Spire2, Tubgcp4, Tubgcp6, Usp37, Zfp207]
GO:0006930	substrate-dependent cell migration, cell extension	GO_BiologicalProcess-GOA_23.02.2017_10h01	0.000210223	0.0527659	42.8571	3	[Cttn, Ntn1, Shtn1]
GO:0048285	organelle fission	GO_BiologicalProcess-GOA_23.02.2017_10h01	0.000249355	0.0623388	4.05616	26	[Aspm, Atrx, Cep192, Chek1, Dctn2, Fsd1, Hecw2, Klhl21, Map10, Mapre2, Mcmbp, Meioc, Mki67, Mlh1, Pde3a, Pds5b, Pex11b, Phip, Pkd1, Ran, Spire1, Spire2, Tubgcp4, Tubgcp6, Usp37, Zfp207]
GO:0000018	regulation of DNA recombination	GO_BiologicalProcess-GOA_23.02.2017_10h01	0.000263932	0.0657191	10.2941	7	[Chek1, Lig3, Mlh1, Spidr, Supt6, Tnfsf13, Zranb3]
GO:0007067	mitotic nuclear division	GO_BiologicalProcess-GOA_23.02.2017_10h01	0.000265148	0.0657567	4.5045	20	[Aspm, Atrx, Cep192, Chek1, Dctn2, Fsd1, Hecw2, Klhl21, Map10, Mapre2, Mcmbp, Mki67, Pds5b, Phip, Pkd1, Ran, Tubgcp4, Tubgcp6, Usp37, Zfp207]
GO:1904893	negative regulation of STAT cascade	GO_BiologicalProcess-GOA_23.02.2017_10h01	0.000314208	0.0776094	12	6	[Bgn, Dab1, Flrt2, Lrrc4, Lrrc4c, Ptprd]
GO:0046426	negative regulation of JAK-STAT cascade	GO_BiologicalProcess-GOA_23.02.2017_10h01	0.000314208	0.0776094	12	6	[Bgn, Dab1, Flrt2, Lrrc4, Lrrc4c, Ptprd]
GO:0002312	B cell activation involved in immune response	GO_BiologicalProcess-GOA_23.02.2017_10h01	0.00031618	0.0777802	10	7	[Cdh17, Hspd1, Icosl, Itfg2, Mlh1, Supt6, Tnfsf13]
GO:0007051	spindle organization	GO_BiologicalProcess-GOA_23.02.2017_10h01	0.000347526	0.0851439	6.99301	10	[Aspm, Atrx, Cep192, Dctn2, Map10, Mlh1, Pkd1, Tubgcp4, Tubgcp6, Zfp207]
GO:0032488	Cdc42 protein signal transduction	GO_BiologicalProcess-GOA_23.02.2017_10h01	0.00049074	0.119741	33.3333	3	[Apoc3, Ntn1, Shtn1]
GO:0044089	positive regulation of cellular component biogenesis	GO_BiologicalProcess-GOA_23.02.2017_10h01	0.000590631	0.143523	4.33839	20	[Arhgef15, Atp7a, Cdh17, Cep295, Cnot6, Crocc, Cttn, Cyfip1, Flrt2, Fuz, Gmfg, Htt, Jmy, Ldb2, Lrrn3, Nck2, Piezo1, Spidr, Spire1, Spire2]
GO:0070189	kynurenine metabolic process	GO_BiologicalProcess-GOA_23.02.2017_10h01	0.000691421	0.167324	30	3	[Ido2, Kyat3, Tdo2]
GO:1903427	negative regulation of reactive oxygen species biosynthetic process	GO_BiologicalProcess-GOA_23.02.2017_10h01	0.000783145	0.188738	17.3913	4	[Acp5, Gla, Hspd1, Mpv17l]
GO:0002562	somatic diversification of immune receptors via germline recombination within a single locus	GO_BiologicalProcess-GOA_23.02.2017_10h01	0.000847271	0.203345	10	6	[Hspd1, Icosl, Mlh1, Supt6, Tnfsf13, Vprbp]
GO:0016444	somatic cell DNA recombination	GO_BiologicalProcess-GOA_23.02.2017_10h01	0.000847271	0.203345	10	6	[Hspd1, Icosl, Mlh1, Supt6, Tnfsf13, Vprbp]
GO:0006368	transcription elongation from RNA polymerase II promoter	GO_BiologicalProcess-GOA_23.02.2017_10h01	0.00103962	0.24847	11.9048	5	[Cdc73, Cdk12, Elof1, Ezh2, Supt6]
GO:0016791	phosphatase activity	GO_MolecularFunction-GOA_23.02.2017_10h01	0.00105898	0.252037	5.07812	13	[Acp1, Acp5, Ctdnep1, Ctdsp1, Impa2, Inpp4b, Pgam5, Phospho1, Plpp5, Ppm1k, Ptpn23, Ptprd, Ubash3b]
GO:0016311	dephosphorylation	GO_BiologicalProcess-GOA_23.02.2017_10h01	0.00116903	0.277059	4.36893	18	[Acp1, Acp5, Cep192, Ctdnep1, Ctdsp1, Fam220a, Htt, Impa2, Inpp4b, Pgam5, Phospho1, Plpp5, Ppm1k, Ppp4r3b, Ptpn23, Ptprd, Sppl3, Ubash3b]
GO:0051225	spindle assembly	GO_BiologicalProcess-GOA_23.02.2017_10h01	0.00117788	0.277979	8.04598	7	[Aspm, Cep192, Map10, Mlh1, Tubgcp4, Tubgcp6, Zfp207]
GO:0005522	profilin binding	GO_MolecularFunction-GOA_23.02.2017_10h01	0.00123304	0.289765	25	3	[Cttn, Cyfip1, Htt]
GO:0006586	indolalkylamine metabolic process	GO_BiologicalProcess-GOA_23.02.2017_10h01	0.00123304	0.289765	25	3	[Atp7a, Ido2, Tdo2]
GO:0006568	tryptophan metabolic process	GO_BiologicalProcess-GOA_23.02.2017_10h01	0.00123304	0.289765	25	3	[Atp7a, Ido2, Tdo2]
GO:0030838	positive regulation of actin filament polymerization	GO_BiologicalProcess-GOA_23.02.2017_10h01	0.00125964	0.294756	7.95455	7	[Cttn, Cyfip1, Gmfg, Jmy, Nck2, Spire1, Spire2]
GO:1901605	alpha-amino acid metabolic process	GO_BiologicalProcess-GOA_23.02.2017_10h01	0.00139451	0.32492	5.47264	11	[Agmat, Atp7a, Cbs, Gatm, Gls2, Htt, Ido2, Kyat3, Mthfr, P4hb, Tdo2]
GO:0002200	somatic diversification of immune receptors	GO_BiologicalProcess-GOA_23.02.2017_10h01	0.00140099	0.32503	9.09091	6	[Hspd1, Icosl, Mlh1, Supt6, Tnfsf13, Vprbp]
GO:0045010	actin nucleation	GO_BiologicalProcess-GOA_23.02.2017_10h01	0.00142682	0.329595	11.1111	5	[Cyfip1, Gmfg, Jmy, Spire1, Spire2]
GO:0002208	somatic diversification of immunoglobulins involved in immune response	GO_BiologicalProcess-GOA_23.02.2017_10h01	0.00142682	0.329595	11.1111	5	[Hspd1, Icosl, Mlh1, Supt6, Tnfsf13]
GO:0045190	isotype switching	GO_BiologicalProcess-GOA_23.02.2017_10h01	0.00142682	0.329595	11.1111	5	[Hspd1, Icosl, Mlh1, Supt6, Tnfsf13]
GO:0002204	somatic recombination of immunoglobulin genes involved in immune response	GO_BiologicalProcess-GOA_23.02.2017_10h01	0.00142682	0.329595	11.1111	5	[Hspd1, Icosl, Mlh1, Supt6, Tnfsf13]
GO:0006826	iron ion transport	GO_BiologicalProcess-GOA_23.02.2017_10h01	0.00157678	0.362659	10.8696	5	[Atp7a, Hamp, Ireb2, Slc25a37, Slc40a1]
GO:0097696	STAT cascade	GO_BiologicalProcess-GOA_23.02.2017_10h01	0.0019508	0.446733	5.58659	10	[Bgn, Crlf3, Dab1, Dot1l, Flrt2, Hamp, Lrrc4, Lrrc4c, Pkd1, Ptprd]
GO:0007259	JAK-STAT cascade	GO_BiologicalProcess-GOA_23.02.2017_10h01	0.0019508	0.446733	5.58659	10	[Bgn, Crlf3, Dab1, Dot1l, Flrt2, Hamp, Lrrc4, Lrrc4c, Pkd1, Ptprd]
GO:0042578	phosphoric ester hydrolase activity	GO_MolecularFunction-GOA_23.02.2017_10h01	0.0021273	0.485025	4.34783	15	[Acp1, Acp5, Ctdnep1, Ctdsp1, Impa2, Inpp4b, Pde3a, Pde8a, Pgam5, Phospho1, Plpp5, Ppm1k, Ptpn23, Ptprd, Ubash3b]
GO:0030686	90S preribosome	GO_CellularComponent-GOA_23.02.2017_10h01	0.00218799	0.496674	13.3333	4	[Cmss1, Kri1, Nol6, Utp6]
GO:0030684	preribosome	GO_CellularComponent-GOA_23.02.2017_10h01	0.00219542	0.496165	8.33333	6	[Cmss1, Kri1, Nol6, Ppan, Tbc1d1, Utp6]
GO:0051258	protein polymerization	GO_BiologicalProcess-GOA_23.02.2017_10h01	0.00220129	0.495289	4.89796	12	[Cep192, Cttn, Cyfip1, Gmfg, Jmy, Nck2, Rasa1, Spire1, Spire2, Tubgcp4, Tubgcp6, Zfp207]
GO:0006470	protein dephosphorylation	GO_BiologicalProcess-GOA_23.02.2017_10h01	0.00227648	0.509933	4.87805	12	[Acp1, Ctdnep1, Ctdsp1, Fam220a, Htt, Pgam5, Ppm1k, Ppp4r3b, Ptpn23, Ptprd, Sppl3, Ubash3b]
GO:0016447	somatic recombination of immunoglobulin gene segments	GO_BiologicalProcess-GOA_23.02.2017_10h01	0.0025055	0.558727	9.80392	5	[Hspd1, Icosl, Mlh1, Supt6, Tnfsf13]
GO:0044450	microtubule organizing center part	GO_CellularComponent-GOA_23.02.2017_10h01	0.00271894	0.603605	5.73248	9	[Cep192, Cep295, Crocc, Htt, Kif24, Ran, Rp2, Tubgcp4, Tubgcp6]
GO:0050770	regulation of axonogenesis	GO_BiologicalProcess-GOA_23.02.2017_10h01	0.00271894	0.603605	5.73248	9	[Cttn, Cyfip1, Dab1, Lrrc4c, Megf8, Ntn1, Plxnb2, Shtn1, Ust]
GO:0070828	heterochromatin organization	GO_BiologicalProcess-GOA_23.02.2017_10h01	0.00297029	0.656433	18.75	3	[Hmga1, Mthfr, Tnrc18]
GO:0006984	ER-nucleus signaling pathway	GO_BiologicalProcess-GOA_23.02.2017_10h01	0.00312729	0.688004	12.1212	4	[Atg10, Erlin1, Nck2, Tmem33]
GO:0002381	immunoglobulin production involved in immunoglobulin mediated immune response	GO_BiologicalProcess-GOA_23.02.2017_10h01	0.00322392	0.706038	9.25926	5	[Hspd1, Icosl, Mlh1, Supt6, Tnfsf13]
GO:0097581	lamellipodium organization	GO_BiologicalProcess-GOA_23.02.2017_10h01	0.00350564	0.764229	7.59494	6	[Atp7a, Cttn, Cyfip1, Nck2, Parvb, Wasf3]
GO:0016445	somatic diversification of immunoglobulins	GO_BiologicalProcess-GOA_23.02.2017_10h01	0.00377844	0.81992	8.92857	5	[Hspd1, Icosl, Mlh1, Supt6, Tnfsf13]
GO:0006275	regulation of DNA replication	GO_BiologicalProcess-GOA_23.02.2017_10h01	0.00383762	0.828926	6.54206	7	[Atrx, Cdan1, Id3, Lig3, Lonp1, Usp37, Zranb3]
GO:0006354	DNA-templated transcription, elongation	GO_BiologicalProcess-GOA_23.02.2017_10h01	0.00407988	0.877173	8.77193	5	[Cdc73, Cdk12, Elof1, Ezh2, Supt6]
GO:0006336	DNA replication-independent nucleosome assembly	GO_BiologicalProcess-GOA_23.02.2017_10h01	0.00421078	0.901106	16.6667	3	[Asf1a, Atrx, Cabin1]
GO:0016592	mediator complex	GO_CellularComponent-GOA_23.02.2017_10h01	0.00430962	0.91795	11.1111	4	[Cdk8, Med16, Med20, Med24]
GO:0051653	spindle localization	GO_BiologicalProcess-GOA_23.02.2017_10h01	0.00430962	0.91795	11.1111	4	[Aspm, Htt, Spire1, Spire2]
GO:0032153	cell division site	GO_CellularComponent-GOA_23.02.2017_10h01	0.00473363	1	8.47458	5	[Fsd1, Spire1, Spire2, Tubgcp4, Tubgcp6]
GO:0032155	cell division site part	GO_CellularComponent-GOA_23.02.2017_10h01	0.00473363	1	8.47458	5	[Fsd1, Spire1, Spire2, Tubgcp4, Tubgcp6]
GO:0032273	positive regulation of protein polymerization	GO_BiologicalProcess-GOA_23.02.2017_10h01	0.00492996	1	6.25	7	[Cttn, Cyfip1, Gmfg, Jmy, Nck2, Spire1, Spire2]
GO:0002705	positive regulation of leukocyte mediated immunity	GO_BiologicalProcess-GOA_23.02.2017_10h01	0.00492996	1	6.25	7	[Fadd, Hspd1, Malt1, Mlh1, Ptafr, Rasgrp1, Tnfsf13]
GO:0043931	ossification involved in bone maturation	GO_BiologicalProcess-GOA_23.02.2017_10h01	0.00493214	1	15.7895	3	[Dchs1, Phospho1, Ryr1]
GO:0034724	DNA replication-independent nucleosome organization	GO_BiologicalProcess-GOA_23.02.2017_10h01	0.00493214	1	15.7895	3	[Asf1a, Atrx, Cabin1]
GO:0002366	leukocyte activation involved in immune response	GO_BiologicalProcess-GOA_23.02.2017_10h01	0.00495536	1	4.64135	11	[Atp7a, Cdh17, Hspd1, Icosl, Itfg2, Mlh1, Pram1, Ptafr, Rasgrp1, Supt6, Tnfsf13]
GO:0000726	non-recombinational repair	GO_BiologicalProcess-GOA_23.02.2017_10h01	0.00524593	1	10.5263	4	[Lig3, Mlh1, Psmd14, Rad52]
GO:0002263	cell activation involved in immune response	GO_BiologicalProcess-GOA_23.02.2017_10h01	0.00527184	1	4.60251	11	[Atp7a, Cdh17, Hspd1, Icosl, Itfg2, Mlh1, Pram1, Ptafr, Rasgrp1, Supt6, Tnfsf13]
GO:0030833	regulation of actin filament polymerization	GO_BiologicalProcess-GOA_23.02.2017_10h01	0.0053239	1	5.59441	8	[Cttn, Cyfip1, Gmfg, Jmy, Nck2, Rasa1, Spire1, Spire2]
GO:0005814	centriole	GO_CellularComponent-GOA_23.02.2017_10h01	0.0054268	1	6.14035	7	[Cep192, Cep295, Crocc, Htt, Kif24, Ran, Rp2]
GO:0035966	response to topologically incorrect protein	GO_BiologicalProcess-GOA_23.02.2017_10h01	0.0054268	1	6.14035	7	[Atf6, Atxn3, Derl2, Hspd1, Manf, Nck2, Tmem33]
GO:1903046	meiotic cell cycle process	GO_BiologicalProcess-GOA_23.02.2017_10h01	0.00549266	1	4.83092	10	[Aspm, Atrx, Meioc, Mki67, Mlh1, Pde3a, Spire1, Spire2, Tubgcp4, Tubgcp6]
GO:1902850	microtubule cytoskeleton organization involved in mitosis	GO_BiologicalProcess-GOA_23.02.2017_10h01	0.00563064	1	6.89655	6	[Dctn2, Map10, Pkd1, Tubgcp4, Tubgcp6, Zfp207]
GO:0007052	mitotic spindle organization	GO_BiologicalProcess-GOA_23.02.2017_10h01	0.00563064	1	6.89655	6	[Dctn2, Map10, Pkd1, Tubgcp4, Tubgcp6, Zfp207]
GO:0045814	negative regulation of gene expression, epigenetic	GO_BiologicalProcess-GOA_23.02.2017_10h01	0.00568885	1	6.08696	7	[Dot1l, Ezh2, Mier1, Msl3, Rrp8, Supt6, Tnrc18]
GO:0070977	bone maturation	GO_BiologicalProcess-GOA_23.02.2017_10h01	0.0057235	1	15	3	[Dchs1, Phospho1, Ryr1]
GO:0043647	inositol phosphate metabolic process	GO_BiologicalProcess-GOA_23.02.2017_10h01	0.00576131	1	10.2564	4	[Impa2, Inpp4b, Ipmk, Ptafr]
GO:0007143	female meiotic division	GO_BiologicalProcess-GOA_23.02.2017_10h01	0.00576131	1	10.2564	4	[Meioc, Mlh1, Spire1, Spire2]
GO:0043954	cellular component maintenance	GO_BiologicalProcess-GOA_23.02.2017_10h01	0.00576131	1	10.2564	4	[Cttn, Gphn, Mthfr, Supt6]
GO:0030032	lamellipodium assembly	GO_BiologicalProcess-GOA_23.02.2017_10h01	0.00584886	1	8.06452	5	[Atp7a, Cyfip1, Nck2, Parvb, Wasf3]
GO:0031334	positive regulation of protein complex assembly	GO_BiologicalProcess-GOA_23.02.2017_10h01	0.00606222	1	4.7619	10	[Cdh17, Cttn, Cyfip1, Gmfg, Jmy, Nck2, Piezo1, Spidr, Spire1, Spire2]
GO:0051783	regulation of nuclear division	GO_BiologicalProcess-GOA_23.02.2017_10h01	0.00617962	1	5.05618	9	[Atrx, Cep192, Chek1, Hecw2, Mki67, Pde3a, Phip, Pkd1, Zfp207]
GO:0040029	regulation of gene expression, epigenetic	GO_BiologicalProcess-GOA_23.02.2017_10h01	0.00626197	1	4.73934	10	[Chek1, Dot1l, Elof1, Ezh2, Glmn, Mier1, Msl3, Rrp8, Supt6, Tnrc18]
GO:0046915	transition metal ion transmembrane transporter activity	GO_MolecularFunction-GOA_23.02.2017_10h01	0.00630935	1	10	4	[Atp7a, Slc25a37, Slc39a5, Slc40a1]
GO:0002703	regulation of leukocyte mediated immunity	GO_BiologicalProcess-GOA_23.02.2017_10h01	0.0064035	1	5.02793	9	[Fadd, Hspd1, Malt1, Mlh1, Pram1, Ptafr, Rasgrp1, Supt6, Tnfsf13]
GO:0042537	benzene-containing compound metabolic process	GO_BiologicalProcess-GOA_23.02.2017_10h01	0.00658657	1	14.2857	3	[Ido2, Kyat3, Tdo2]
GO:1902117	positive regulation of organelle assembly	GO_BiologicalProcess-GOA_23.02.2017_10h01	0.00668778	1	7.8125	5	[Cep295, Cnot6, Crocc, Fuz, Htt]
GO:0032535	regulation of cellular component size	GO_BiologicalProcess-GOA_23.02.2017_10h01	0.00688859	1	4.05797	14	[Arhgap5, Atp7a, Cttn, Cyfip1, Gmfg, Jmy, Megf8, Nck2, Ntn1, Pex11b, Rasa1, Shtn1, Spire1, Spire2]
GO:0006576	cellular biogenic amine metabolic process	GO_BiologicalProcess-GOA_23.02.2017_10h01	0.00689092	1	9.7561	4	[Agmat, Atp7a, Ido2, Tdo2]
GO:0090329	regulation of DNA-dependent DNA replication	GO_BiologicalProcess-GOA_23.02.2017_10h01	0.00689092	1	9.7561	4	[Atrx, Lig3, Lonp1, Zranb3]
GO:0051213	dioxygenase activity	GO_MolecularFunction-GOA_23.02.2017_10h01	0.00698938	1	6.59341	6	[Alkbh3, Ido2, Jmjd1c, P3h2, P4hb, Tdo2]
GO:0007088	regulation of mitotic nuclear division	GO_BiologicalProcess-GOA_23.02.2017_10h01	0.0073283	1	5.29801	8	[Atrx, Cep192, Chek1, Hecw2, Mki67, Phip, Pkd1, Zfp207]
GO:1903510	mucopolysaccharide metabolic process	GO_BiologicalProcess-GOA_23.02.2017_10h01	0.00760749	1	7.57576	5	[Bgn, Chst13, Hs2st1, Itih4, Mki67]
GO:1905897	regulation of response to endoplasmic reticulum stress	GO_BiologicalProcess-GOA_23.02.2017_10h01	0.00760749	1	7.57576	5	[Atxn3, Derl2, Nck2, Os9, Tmem33]
GO:0001738	morphogenesis of a polarized epithelium	GO_BiologicalProcess-GOA_23.02.2017_10h01	0.00809881	1	7.46269	5	[Astn2, Ctnnd1, Dchs1, Fuz, Lama5]
GO:0055076	transition metal ion homeostasis	GO_BiologicalProcess-GOA_23.02.2017_10h01	0.00813884	1	5.69106	7	[Atp7a, Hamp, Htt, Ireb2, Slc25a37, Slc39a5, Slc40a1]
GO:0006284	base-excision repair	GO_BiologicalProcess-GOA_23.02.2017_10h01	0.00815793	1	9.30233	4	[Hmga1, Huwe1, Lig3, Xpa]
GO:0045773	positive regulation of axon extension	GO_BiologicalProcess-GOA_23.02.2017_10h01	0.00815793	1	9.30233	4	[Cyfip1, Megf8, Ntn1, Shtn1]
GO:0008154	actin polymerization or depolymerization	GO_BiologicalProcess-GOA_23.02.2017_10h01	0.00842639	1	4.81283	9	[Cttn, Cyfip1, Gmfg, Jmy, Nck2, Rasa1, Spire1, Spire2, Wipf1]
GO:0070325	lipoprotein particle receptor binding	GO_MolecularFunction-GOA_23.02.2017_10h01	0.00853386	1	13.0435	3	[Apoc3, Dnaja1, Snx17]
GO:0072520	seminiferous tubule development	GO_BiologicalProcess-GOA_23.02.2017_10h01	0.00853386	1	13.0435	3	[Atrx, Jmjd1c, Wdr48]
GO:0045724	positive regulation of cilium assembly	GO_BiologicalProcess-GOA_23.02.2017_10h01	0.00853386	1	13.0435	3	[Crocc, Fuz, Htt]
GO:0044455	mitochondrial membrane part	GO_CellularComponent-GOA_23.02.2017_10h01	0.00870989	1	4.78723	9	[Hspd1, Ndufc2, Noa1, Pet100, Ppox, Slc8b1, Tomm6, Uqcrb, Uqcrc1]
GO:1904892	regulation of STAT cascade	GO_BiologicalProcess-GOA_23.02.2017_10h01	0.00884154	1	5.12821	8	[Bgn, Crlf3, Dab1, Dot1l, Flrt2, Lrrc4, Lrrc4c, Ptprd]
GO:0046425	regulation of JAK-STAT cascade	GO_BiologicalProcess-GOA_23.02.2017_10h01	0.00884154	1	5.12821	8	[Bgn, Crlf3, Dab1, Dot1l, Flrt2, Lrrc4, Lrrc4c, Ptprd]
GO:0006338	chromatin remodeling	GO_BiologicalProcess-GOA_23.02.2017_10h01	0.00885691	1	5.6	7	[Atrx, Cecr2, Chek1, Elof1, Hmga1, Msl3, Tnrc18]
GO:0002708	positive regulation of lymphocyte mediated immunity	GO_BiologicalProcess-GOA_23.02.2017_10h01	0.00900334	1	6.25	6	[Fadd, Hspd1, Malt1, Mlh1, Rasgrp1, Tnfsf13]
GO:0030041	actin filament polymerization	GO_BiologicalProcess-GOA_23.02.2017_10h01	0.00917027	1	5.09554	8	[Cttn, Cyfip1, Gmfg, Jmy, Nck2, Rasa1, Spire1, Spire2]
GO:0030198	extracellular matrix organization	GO_BiologicalProcess-GOA_23.02.2017_10h01	0.00935264	1	4.46429	10	[Abi3bp, Adamtsl2, Atp7a, Col4a3, Flrt2, Lama5, Lamb1, Mia3, Mpv17, Plg]
GO:0000041	transition metal ion transport	GO_BiologicalProcess-GOA_23.02.2017_10h01	0.00945111	1	6.18557	6	[Atp7a, Hamp, Ireb2, Slc25a37, Slc39a5, Slc40a1]
GO:0006986	response to unfolded protein	GO_BiologicalProcess-GOA_23.02.2017_10h01	0.00945111	1	6.18557	6	[Atf6, Derl2, Hspd1, Manf, Nck2, Tmem33]
GO:0007029	endoplasmic reticulum organization	GO_BiologicalProcess-GOA_23.02.2017_10h01	0.00956868	1	8.88889	4	[Htt, Lman1, Shtn1, Tmem33]
GO:0002335	mature B cell differentiation	GO_BiologicalProcess-GOA_23.02.2017_10h01	0.00962068	1	12.5	3	[Cdh17, Itfg2, Malt1]
GO:0031646	positive regulation of neurological system process	GO_BiologicalProcess-GOA_23.02.2017_10h01	0.00962068	1	12.5	3	[Myrf, Ptafr, Wasf3]
GO:0007020	microtubule nucleation	GO_BiologicalProcess-GOA_23.02.2017_10h01	0.00962068	1	12.5	3	[Cep192, Tubgcp4, Tubgcp6]
GO:1904292	regulation of ERAD pathway	GO_BiologicalProcess-GOA_23.02.2017_10h01	0.00962068	1	12.5	3	[Atxn3, Derl2, Os9]
GO:0043062	extracellular structure organization	GO_BiologicalProcess-GOA_23.02.2017_10h01	0.00963143	1	4.44444	10	[Abi3bp, Adamtsl2, Atp7a, Col4a3, Flrt2, Lama5, Lamb1, Mia3, Mpv17, Plg]
GO:0032729	positive regulation of interferon-gamma production	GO_BiologicalProcess-GOA_23.02.2017_10h01	0.00970406	1	7.14286	5	[Fadd, Hspd1, Il12rb2, Rasgrp1, Zfpm1]
GO:0006333	chromatin assembly or disassembly	GO_BiologicalProcess-GOA_23.02.2017_10h01	0.0100197	1	5.46875	7	[Arid2, Asf1a, Atrx, Cabin1, Cdan1, Hmga1, Tnrc18]
GO:0045839	negative regulation of mitotic nuclear division	GO_BiologicalProcess-GOA_23.02.2017_10h01	0.0103298	1	8.69565	4	[Atrx, Cep192, Chek1, Zfp207]
GO:0042254	ribosome biogenesis	GO_BiologicalProcess-GOA_23.02.2017_10h01	0.010735	1	4.16667	11	[Exosc8, Kri1, Nol6, Ppan, Ran, Rpl10l, Rps27l, Rrp8, Tarbp1, Tbc1d1, Utp6]
GO:0080008	Cul4-RING E3 ubiquitin ligase complex	GO_CellularComponent-GOA_23.02.2017_10h01	0.0107844	1	12	3	[Dcaf11, Dcaf4, Glmn]
GO:0048799	animal organ maturation	GO_BiologicalProcess-GOA_23.02.2017_10h01	0.0107844	1	12	3	[Dchs1, Phospho1, Ryr1]
GO:0045910	negative regulation of DNA recombination	GO_BiologicalProcess-GOA_23.02.2017_10h01	0.0107844	1	12	3	[Lig3, Mlh1, Zranb3]
GO:0033108	mitochondrial respiratory chain complex assembly	GO_BiologicalProcess-GOA_23.02.2017_10h01	0.0111291	1	8.51064	4	[Cox14, Ndufc2, Pet100, Uqcrb]
GO:0007126	meiotic nuclear division	GO_BiologicalProcess-GOA_23.02.2017_10h01	0.0112457	1	4.59184	9	[Aspm, Meioc, Mki67, Mlh1, Pde3a, Spire1, Spire2, Tubgcp4, Tubgcp6]
GO:0008064	regulation of actin polymerization or depolymerization	GO_BiologicalProcess-GOA_23.02.2017_10h01	0.0113375	1	4.90798	8	[Cttn, Cyfip1, Gmfg, Jmy, Nck2, Rasa1, Spire1, Spire2]
GO:0044438	microbody part	GO_CellularComponent-GOA_23.02.2017_10h01	0.0115154	1	6.84932	5	[Acox3, Hspd1, Mpv17l, Pecr, Pex11b]
GO:0044439	peroxisomal part	GO_CellularComponent-GOA_23.02.2017_10h01	0.0115154	1	6.84932	5	[Acox3, Hspd1, Mpv17l, Pecr, Pex11b]
GO:0030832	regulation of actin filament length	GO_BiologicalProcess-GOA_23.02.2017_10h01	0.0117325	1	4.87805	8	[Cttn, Cyfip1, Gmfg, Jmy, Nck2, Rasa1, Spire1, Spire2]
GO:0004721	phosphoprotein phosphatase activity	GO_MolecularFunction-GOA_23.02.2017_10h01	0.0121375	1	4.84848	8	[Acp1, Ctdnep1, Ctdsp1, Pgam5, Ppm1k, Ptpn23, Ptprd, Ubash3b]
GO:0045930	negative regulation of mitotic cell cycle	GO_BiologicalProcess-GOA_23.02.2017_10h01	0.0123267	1	4.52261	9	[Atrx, Cdc73, Cep192, Chek1, Ctdsp1, Ezh2, Rps27l, Trim35, Zfp207]
GO:0070603	SWI/SNF superfamily-type complex	GO_CellularComponent-GOA_23.02.2017_10h01	0.0128431	1	6.66667	5	[Arid2, Atrx, Cecr2, Hmgxb4, Mcrs1]
GO:0031122	cytoplasmic microtubule organization	GO_BiologicalProcess-GOA_23.02.2017_10h01	0.0128445	1	8.16327	4	[Ccdc88c, Map10, Tubgcp4, Tubgcp6]
GO:0070646	protein modification by small protein removal	GO_BiologicalProcess-GOA_23.02.2017_10h01	0.0131601	1	5.18518	7	[Atxn3, Psmd14, Senp5, Tank, Usp37, Usp40, Wdr48]
GO:0006929	substrate-dependent cell migration	GO_BiologicalProcess-GOA_23.02.2017_10h01	0.0133463	1	11.1111	3	[Cttn, Ntn1, Shtn1]
GO:0016234	inclusion body	GO_CellularComponent-GOA_23.02.2017_10h01	0.0135442	1	6.57895	5	[Atxn1, Atxn3, Cabin1, Htt, Sfmbt2]
GO:0050772	positive regulation of axonogenesis	GO_BiologicalProcess-GOA_23.02.2017_10h01	0.0135442	1	6.57895	5	[Cyfip1, Megf8, Ntn1, Plxnb2, Shtn1]
GO:0031497	chromatin assembly	GO_BiologicalProcess-GOA_23.02.2017_10h01	0.0136205	1	5.71429	6	[Asf1a, Atrx, Cabin1, Cdan1, Hmga1, Tnrc18]
GO:0060428	lung epithelium development	GO_BiologicalProcess-GOA_23.02.2017_10h01	0.0137619	1	8	4	[Adamtsl2, Errfi1, Fndc3b, Pkd1]
GO:2000273	positive regulation of receptor activity	GO_BiologicalProcess-GOA_23.02.2017_10h01	0.0137619	1	8	4	[Cyfip1, Gsto1, Htt, Med16]
GO:0008757	S-adenosylmethionine-dependent methyltransferase activity	GO_MolecularFunction-GOA_23.02.2017_10h01	0.0141741	1	5.10949	7	[Dot1l, Ezh2, Pcmt1, Rrp8, Setd1b, Tarbp1, Trdmt1]
GO:1902905	positive regulation of supramolecular fiber organization	GO_BiologicalProcess-GOA_23.02.2017_10h01	0.0143185	1	4.70588	8	[Arhgef15, Cttn, Cyfip1, Gmfg, Jmy, Nck2, Spire1, Spire2]
GO:0002285	lymphocyte activation involved in immune response	GO_BiologicalProcess-GOA_23.02.2017_10h01	0.0143185	1	4.70588	8	[Atp7a, Cdh17, Hspd1, Icosl, Itfg2, Mlh1, Supt6, Tnfsf13]
GO:0002706	regulation of lymphocyte mediated immunity	GO_BiologicalProcess-GOA_23.02.2017_10h01	0.0147016	1	5.07246	7	[Fadd, Hspd1, Malt1, Mlh1, Rasgrp1, Supt6, Tnfsf13]
GO:0042887	amide transmembrane transporter activity	GO_MolecularFunction-GOA_23.02.2017_10h01	0.0147459	1	10.7143	3	[Cdh17, Ran, Slc38a7]
GO:0017004	cytochrome complex assembly	GO_BiologicalProcess-GOA_23.02.2017_10h01	0.0147459	1	10.7143	3	[Cox14, Pet100, Uqcrb]
GO:0042430	indole-containing compound metabolic process	GO_BiologicalProcess-GOA_23.02.2017_10h01	0.0147459	1	10.7143	3	[Atp7a, Ido2, Tdo2]
GO:0072509	divalent inorganic cation transmembrane transporter activity	GO_MolecularFunction-GOA_23.02.2017_10h01	0.0152662	1	4.65116	8	[Caps2, Orai3, Pkd1, Ryr1, Slc25a37, Slc39a5, Slc40a1, Slc8b1]
GO:0008023	transcription elongation factor complex	GO_CellularComponent-GOA_23.02.2017_10h01	0.015719	1	7.69231	4	[Cdc73, Cdk12, Elof1, Supt6]
GO:0006342	chromatin silencing	GO_BiologicalProcess-GOA_23.02.2017_10h01	0.0161245	1	5.50459	6	[Dot1l, Mier1, Msl3, Rrp8, Supt6, Tnrc18]
GO:0009072	aromatic amino acid family metabolic process	GO_BiologicalProcess-GOA_23.02.2017_10h01	0.0162253	1	10.3448	3	[Atp7a, Ido2, Tdo2]
GO:1905898	positive regulation of response to endoplasmic reticulum stress	GO_BiologicalProcess-GOA_23.02.2017_10h01	0.0162253	1	10.3448	3	[Atxn3, Nck2, Tmem33]
GO:0000082	G1/S transition of mitotic cell cycle	GO_BiologicalProcess-GOA_23.02.2017_10h01	0.0162585	1	4.5977	8	[Cdc73, Crlf3, Ctdsp1, Ezh2, Npat, Pkd1, Rps27l, Usp37]
GO:0030170	pyridoxal phosphate binding	GO_MolecularFunction-GOA_23.02.2017_10h01	0.0167597	1	7.54717	4	[Accs, Alb, Cbs, Kyat3]
GO:0043620	regulation of DNA-templated transcription in response to stress	GO_BiologicalProcess-GOA_23.02.2017_10h01	0.0167597	1	7.54717	4	[Atf6, Chek1, Jmy, Nck2]
GO:0090307	mitotic spindle assembly	GO_BiologicalProcess-GOA_23.02.2017_10h01	0.0167597	1	7.54717	4	[Map10, Tubgcp4, Tubgcp6, Zfp207]
GO:0036075	replacement ossification	GO_BiologicalProcess-GOA_23.02.2017_10h01	0.017785	1	10	3	[Cbs, Col10a1, Phospho1]
GO:0001958	endochondral ossification	GO_BiologicalProcess-GOA_23.02.2017_10h01	0.017785	1	10	3	[Cbs, Col10a1, Phospho1]
GO:0034243	regulation of transcription elongation from RNA polymerase II promoter	GO_BiologicalProcess-GOA_23.02.2017_10h01	0.017785	1	10	3	[Cdc73, Ezh2, Supt6]
GO:0070279	vitamin B6 binding	GO_MolecularFunction-GOA_23.02.2017_10h01	0.0178426	1	7.40741	4	[Accs, Alb, Cbs, Kyat3]
GO:2000378	negative regulation of reactive oxygen species metabolic process	GO_BiologicalProcess-GOA_23.02.2017_10h01	0.0178426	1	7.40741	4	[Acp5, Gla, Hspd1, Mpv17l]
GO:0033047	regulation of mitotic sister chromatid segregation	GO_BiologicalProcess-GOA_23.02.2017_10h01	0.0178426	1	7.40741	4	[Atrx, Cep192, Hecw2, Zfp207]
GO:2000134	negative regulation of G1/S transition of mitotic cell cycle	GO_BiologicalProcess-GOA_23.02.2017_10h01	0.0178426	1	7.40741	4	[Cdc73, Ctdsp1, Ezh2, Rps27l]
GO:0051168	nuclear export	GO_BiologicalProcess-GOA_23.02.2017_10h01	0.0181633	1	4.86111	7	[Atxn1, Malt1, Nol6, Pkd1, Ran, Ranbp17, Supt6]
GO:0042579	microbody	GO_CellularComponent-GOA_23.02.2017_10h01	0.0181633	1	4.86111	7	[Acox3, Hspd1, Mpv17, Mpv17l, Pecr, Pex11b, Tmem173]
GO:0005777	peroxisome	GO_CellularComponent-GOA_23.02.2017_10h01	0.0181633	1	4.86111	7	[Acox3, Hspd1, Mpv17, Mpv17l, Pecr, Pex11b, Tmem173]
GO:0030516	regulation of axon extension	GO_BiologicalProcess-GOA_23.02.2017_10h01	0.0182953	1	6.09756	5	[Cttn, Cyfip1, Megf8, Ntn1, Shtn1]
GO:0032680	regulation of tumor necrosis factor production	GO_BiologicalProcess-GOA_23.02.2017_10h01	0.0189298	1	5.30973	6	[Acp5, Errfi1, Fadd, Hspd1, Ptafr, Rasgrp1]
GO:0006520	cellular amino acid metabolic process	GO_BiologicalProcess-GOA_23.02.2017_10h01	0.0191084	1	4.04412	11	[Agmat, Atp7a, Cbs, Gatm, Gls2, Htt, Ido2, Kyat3, Mthfr, P4hb, Tdo2]
GO:0051293	establishment of spindle localization	GO_BiologicalProcess-GOA_23.02.2017_10h01	0.0194253	1	9.67742	3	[Htt, Spire1, Spire2]
GO:0008156	negative regulation of DNA replication	GO_BiologicalProcess-GOA_23.02.2017_10h01	0.0194253	1	9.67742	3	[Cdan1, Lig3, Zranb3]
GO:0045191	regulation of isotype switching	GO_BiologicalProcess-GOA_23.02.2017_10h01	0.0194253	1	9.67742	3	[Mlh1, Supt6, Tnfsf13]
GO:0016579	protein deubiquitination	GO_BiologicalProcess-GOA_23.02.2017_10h01	0.01968	1	5.26316	6	[Atxn3, Psmd14, Tank, Usp37, Usp40, Wdr48]
GO:0034976	response to endoplasmic reticulum stress	GO_BiologicalProcess-GOA_23.02.2017_10h01	0.0199674	1	4.16667	9	[Atf6, Atg10, Atxn3, Derl2, Erlin1, Nck2, Os9, P4hb, Tmem33]
GO:0032271	regulation of protein polymerization	GO_BiologicalProcess-GOA_23.02.2017_10h01	0.0200992	1	4.41989	8	[Cttn, Cyfip1, Gmfg, Jmy, Nck2, Rasa1, Spire1, Spire2]
GO:2001251	negative regulation of chromosome organization	GO_BiologicalProcess-GOA_23.02.2017_10h01	0.0204502	1	5.21739	6	[Atrx, Cep192, Ctbp1, Mcrs1, Supt6, Zfp207]
GO:1903555	regulation of tumor necrosis factor superfamily cytokine production	GO_BiologicalProcess-GOA_23.02.2017_10h01	0.0204502	1	5.21739	6	[Acp5, Errfi1, Fadd, Hspd1, Ptafr, Rasgrp1]
GO:0032640	tumor necrosis factor production	GO_BiologicalProcess-GOA_23.02.2017_10h01	0.0204502	1	5.21739	6	[Acp5, Errfi1, Fadd, Hspd1, Ptafr, Rasgrp1]
GO:0048771	tissue remodeling	GO_BiologicalProcess-GOA_23.02.2017_10h01	0.0206962	1	4.3956	8	[Acp5, Atp7a, Bgn, Cbs, Hamp, Inpp4b, Plg, Ubash3b]
GO:0044843	cell cycle G1/S phase transition	GO_BiologicalProcess-GOA_23.02.2017_10h01	0.021928	1	4.34783	8	[Cdc73, Crlf3, Ctdsp1, Ezh2, Npat, Pkd1, Rps27l, Usp37]
GO:0035967	cellular response to topologically incorrect protein	GO_BiologicalProcess-GOA_23.02.2017_10h01	0.0220063	1	5.81395	5	[Atf6, Atxn3, Derl2, Nck2, Tmem33]
GO:0051983	regulation of chromosome segregation	GO_BiologicalProcess-GOA_23.02.2017_10h01	0.0220063	1	5.81395	5	[Atrx, Cep192, Hecw2, Mki67, Zfp207]
GO:0016331	morphogenesis of embryonic epithelium	GO_BiologicalProcess-GOA_23.02.2017_10h01	0.0225629	1	4.32432	8	[Cecr2, Fuz, Glmn, Hs2st1, Htt, Ipmk, Lama5, Plxnb2]
GO:0004722	protein serine/threonine phosphatase activity	GO_MolecularFunction-GOA_23.02.2017_10h01	0.0226038	1	6.89655	4	[Ctdnep1, Ctdsp1, Pgam5, Ppm1k]
GO:0051784	negative regulation of nuclear division	GO_BiologicalProcess-GOA_23.02.2017_10h01	0.0226038	1	6.89655	4	[Atrx, Cep192, Chek1, Zfp207]
GO:1902807	negative regulation of cell cycle G1/S phase transition	GO_BiologicalProcess-GOA_23.02.2017_10h01	0.0226038	1	6.89655	4	[Cdc73, Ctdsp1, Ezh2, Rps27l]
GO:0006261	DNA-dependent DNA replication	GO_BiologicalProcess-GOA_23.02.2017_10h01	0.0228827	1	5.08475	6	[Atrx, Lig3, Lonp1, Mcmbp, Pola2, Zranb3]
GO:0071706	tumor necrosis factor superfamily cytokine production	GO_BiologicalProcess-GOA_23.02.2017_10h01	0.0228827	1	5.08475	6	[Acp5, Errfi1, Fadd, Hspd1, Ptafr, Rasgrp1]
GO:0006303	double-strand break repair via nonhomologous end joining	GO_BiologicalProcess-GOA_23.02.2017_10h01	0.0229483	1	9.09091	3	[Lig3, Mlh1, Psmd14]
GO:0034314	Arp2/3 complex-mediated actin nucleation	GO_BiologicalProcess-GOA_23.02.2017_10h01	0.0229483	1	9.09091	3	[Cyfip1, Gmfg, Jmy]
GO:0032092	positive regulation of protein binding	GO_BiologicalProcess-GOA_23.02.2017_10h01	0.0230049	1	5.74713	5	[Fam220a, Pkd1, Ran, Sppl3, Tmem173]
GO:0006302	double-strand break repair	GO_BiologicalProcess-GOA_23.02.2017_10h01	0.0232107	1	4.30108	8	[Chek1, Lig3, Meioc, Mlh1, Psmd14, Rad52, Spidr, Wdr48]
GO:0072006	nephron development	GO_BiologicalProcess-GOA_23.02.2017_10h01	0.0236198	1	4.60526	7	[Col4a3, Ctnnd1, Dchs1, Hs2st1, Lama5, Mpv17, Pkd1]
GO:0046434	organophosphate catabolic process	GO_BiologicalProcess-GOA_23.02.2017_10h01	0.0237349	1	5.04202	6	[Entpd7, Impa2, Inpp4b, Pde3a, Pde8a, Pla2g4b]
GO:0046916	cellular transition metal ion homeostasis	GO_BiologicalProcess-GOA_23.02.2017_10h01	0.0240322	1	5.68182	5	[Atp7a, Hamp, Ireb2, Slc39a5, Slc40a1]
GO:1901991	negative regulation of mitotic cell cycle phase transition	GO_BiologicalProcess-GOA_23.02.2017_10h01	0.0246081	1	5	6	[Cdc73, Cep192, Ctdsp1, Ezh2, Rps27l, Zfp207]
GO:0016504	peptidase activator activity	GO_MolecularFunction-GOA_23.02.2017_10h01	0.024831	1	8.82353	3	[Psmd14, Rps27l, Tank]
GO:0010952	positive regulation of peptidase activity	GO_BiologicalProcess-GOA_23.02.2017_10h01	0.0251428	1	4.54545	7	[Col4a3, Diablo, Fadd, Hspd1, Psmd14, Rps27l, Tank]
GO:0030010	establishment of cell polarity	GO_BiologicalProcess-GOA_23.02.2017_10h01	0.0255026	1	4.95868	6	[Frmd4a, Frmd4b, Htt, Pkd1, Shtn1, Ust]
GO:0006260	DNA replication	GO_BiologicalProcess-GOA_23.02.2017_10h01	0.0263061	1	4.09836	10	[Atrx, Cdan1, Cinp, Id3, Lig3, Lonp1, Mcmbp, Pola2, Usp37, Zranb3]
GO:0008146	sulfotransferase activity	GO_MolecularFunction-GOA_23.02.2017_10h01	0.0266362	1	6.55738	4	[Chst13, Hs2st1, Tpst2, Ust]
GO:1901607	alpha-amino acid biosynthetic process	GO_BiologicalProcess-GOA_23.02.2017_10h01	0.0266362	1	6.55738	4	[Cbs, Gatm, Gls2, Mthfr]
GO:1902115	regulation of organelle assembly	GO_BiologicalProcess-GOA_23.02.2017_10h01	0.0267316	1	4.48718	7	[Atxn2l, Cep192, Cep295, Cnot6, Crocc, Fuz, Htt]
GO:0047496	vesicle transport along microtubule	GO_BiologicalProcess-GOA_23.02.2017_10h01	0.0267945	1	8.57143	3	[Ap3m1, Htt, Rasgrp1]
GO:2001222	regulation of neuron migration	GO_BiologicalProcess-GOA_23.02.2017_10h01	0.0267945	1	8.57143	3	[Flrt2, Plxnb2, Shtn1]
GO:0033048	negative regulation of mitotic sister chromatid segregation	GO_BiologicalProcess-GOA_23.02.2017_10h01	0.0267945	1	8.57143	3	[Atrx, Cep192, Zfp207]
GO:0051321	meiotic cell cycle	GO_BiologicalProcess-GOA_23.02.2017_10h01	0.0278754	1	4	10	[Aspm, Atrx, Meioc, Mki67, Mlh1, Pde3a, Spire1, Spire2, Tubgcp4, Tubgcp6]
GO:0000002	mitochondrial genome maintenance	GO_BiologicalProcess-GOA_23.02.2017_10h01	0.0288386	1	8.33333	3	[Lig3, Lonp1, Mpv17]
GO:1901617	organic hydroxy compound biosynthetic process	GO_BiologicalProcess-GOA_23.02.2017_10h01	0.0288698	1	4.12371	8	[Atp7a, Erlin1, Htt, Impa2, Ipmk, Oca2, Ptafr, Sc5d]
GO:0043621	protein self-association	GO_MolecularFunction-GOA_23.02.2017_10h01	0.0295486	1	6.34921	4	[Atxn1, Ccdc88c, Malt1, Tcf4]
GO:0006661	phosphatidylinositol biosynthetic process	GO_BiologicalProcess-GOA_23.02.2017_10h01	0.0295486	1	6.34921	4	[Cdipt, Inpp4b, Pigo, Pik3c2g]
GO:0051495	positive regulation of cytoskeleton organization	GO_BiologicalProcess-GOA_23.02.2017_10h01	0.0296385	1	4.10256	8	[Arhgef15, Cttn, Cyfip1, Gmfg, Jmy, Nck2, Spire1, Spire2]
GO:0010948	negative regulation of cell cycle process	GO_BiologicalProcess-GOA_23.02.2017_10h01	0.0296385	1	4.10256	8	[Atrx, Cdc73, Cep192, Chek1, Ctdsp1, Ezh2, Rps27l, Zfp207]
GO:0000819	sister chromatid segregation	GO_BiologicalProcess-GOA_23.02.2017_10h01	0.0301117	1	4.375	7	[Atrx, Cep192, Hecw2, Map10, Mcmbp, Pds5b, Zfp207]
GO:0042393	histone binding	GO_MolecularFunction-GOA_23.02.2017_10h01	0.0301117	1	4.375	7	[Asf1a, Atrx, Msl3, Phip, Rrp8, Sfmbt2, Supt6]
GO:0016779	nucleotidyltransferase activity	GO_MolecularFunction-GOA_23.02.2017_10h01	0.0302992	1	4.7619	6	[Gphn, Pcyt2, Pola2, Rev1, Yrdc, Zcchc6]
GO:1990204	oxidoreductase complex	GO_CellularComponent-GOA_23.02.2017_10h01	0.0308159	1	5.31915	5	[Mrps36, Ndufc2, P4hb, Uqcrb, Uqcrc1]
GO:0017046	peptide hormone binding	GO_MolecularFunction-GOA_23.02.2017_10h01	0.030963	1	8.10811	3	[C2cd2l, Hspd1, Slc40a1]
GO:0019894	kinesin binding	GO_MolecularFunction-GOA_23.02.2017_10h01	0.030963	1	8.10811	3	[Crocc, Ktn1, Shtn1]
GO:0050850	positive regulation of calcium-mediated signaling	GO_BiologicalProcess-GOA_23.02.2017_10h01	0.030963	1	8.10811	3	[Gsto1, Htt, Sppl3]
GO:0033046	negative regulation of sister chromatid segregation	GO_BiologicalProcess-GOA_23.02.2017_10h01	0.030963	1	8.10811	3	[Atrx, Cep192, Zfp207]
GO:0042108	positive regulation of cytokine biosynthetic process	GO_BiologicalProcess-GOA_23.02.2017_10h01	0.0310726	1	6.25	4	[Glmn, Icosl, Ptafr, Zfpm1]
GO:0046785	microtubule polymerization	GO_BiologicalProcess-GOA_23.02.2017_10h01	0.0310726	1	6.25	4	[Cep192, Tubgcp4, Tubgcp6, Zfp207]
GO:0008652	cellular amino acid biosynthetic process	GO_BiologicalProcess-GOA_23.02.2017_10h01	0.0326422	1	6.15385	4	[Cbs, Gatm, Gls2, Mthfr]
GO:0002711	positive regulation of T cell mediated immunity	GO_BiologicalProcess-GOA_23.02.2017_10h01	0.0331673	1	7.89474	3	[Fadd, Hspd1, Malt1]
GO:0000794	condensed nuclear chromosome	GO_CellularComponent-GOA_23.02.2017_10h01	0.0333181	1	5.20833	5	[Atrx, Chek1, Lig3, Mlh1, Nol6]
GO:0002824	positive regulation of adaptive immune response based on somatic recombination of immune receptors built from immunoglobulin superfamily domains	GO_BiologicalProcess-GOA_23.02.2017_10h01	0.0333181	1	5.20833	5	[Fadd, Hspd1, Malt1, Mlh1, Tnfsf13]
GO:0005657	replication fork	GO_CellularComponent-GOA_23.02.2017_10h01	0.0342573	1	6.06061	4	[Chek1, Pola2, Xpa, Zranb3]
GO:0005643	nuclear pore	GO_CellularComponent-GOA_23.02.2017_10h01	0.0342573	1	6.06061	4	[Rae1, Ran, Ranbp17, Tmem33]
GO:0032760	positive regulation of tumor necrosis factor production	GO_BiologicalProcess-GOA_23.02.2017_10h01	0.0342573	1	6.06061	4	[Fadd, Hspd1, Ptafr, Rasgrp1]
GO:0033045	regulation of sister chromatid segregation	GO_BiologicalProcess-GOA_23.02.2017_10h01	0.0342573	1	6.06061	4	[Atrx, Cep192, Hecw2, Zfp207]
GO:0000070	mitotic sister chromatid segregation	GO_BiologicalProcess-GOA_23.02.2017_10h01	0.0345357	1	4.61538	6	[Atrx, Cep192, Hecw2, Map10, Pds5b, Zfp207]
GO:1901988	negative regulation of cell cycle phase transition	GO_BiologicalProcess-GOA_23.02.2017_10h01	0.0345357	1	4.61538	6	[Cdc73, Cep192, Ctdsp1, Ezh2, Rps27l, Zfp207]
GO:0005604	basement membrane	GO_CellularComponent-GOA_23.02.2017_10h01	0.0346152	1	5.15464	5	[Col4a3, Lama5, Lamb1, Ntn1, P3h2]
GO:0031109	microtubule polymerization or depolymerization	GO_BiologicalProcess-GOA_23.02.2017_10h01	0.0346152	1	5.15464	5	[Cep192, Kif24, Tubgcp4, Tubgcp6, Zfp207]
GO:0000725	recombinational repair	GO_BiologicalProcess-GOA_23.02.2017_10h01	0.0346152	1	5.15464	5	[Chek1, Psmd14, Rad52, Spidr, Wdr48]
GO:0000724	double-strand break repair via homologous recombination	GO_BiologicalProcess-GOA_23.02.2017_10h01	0.0346152	1	5.15464	5	[Chek1, Psmd14, Rad52, Spidr, Wdr48]
GO:0030176	integral component of endoplasmic reticulum membrane	GO_CellularComponent-GOA_23.02.2017_10h01	0.0356515	1	4.58015	6	[Atf6, Derl2, Ktn1, Rrbp1, Sppl3, Tmem33]
GO:1902275	regulation of chromatin organization	GO_BiologicalProcess-GOA_23.02.2017_10h01	0.0357031	1	4.21687	7	[Atrx, Chek1, Ctbp1, Mier1, Mki67, Mthfr, Supt6]
GO:0005811	lipid particle	GO_CellularComponent-GOA_23.02.2017_10h01	0.0359182	1	5.97015	4	[Aifm2, Atg2a, Hsd17b11, Sccpdh]
GO:1903557	positive regulation of tumor necrosis factor superfamily cytokine production	GO_BiologicalProcess-GOA_23.02.2017_10h01	0.0359182	1	5.97015	4	[Fadd, Hspd1, Ptafr, Rasgrp1]
GO:0030968	endoplasmic reticulum unfolded protein response	GO_BiologicalProcess-GOA_23.02.2017_10h01	0.0359182	1	5.97015	4	[Atf6, Derl2, Nck2, Tmem33]
GO:0005178	integrin binding	GO_MolecularFunction-GOA_23.02.2017_10h01	0.0359432	1	5.10204	5	[Cdh17, Col4a3, Lama5, Lamb1, P4hb]
GO:0061387	regulation of extent of cell growth	GO_BiologicalProcess-GOA_23.02.2017_10h01	0.0373022	1	5.05051	5	[Cttn, Cyfip1, Megf8, Ntn1, Shtn1]
GO:0032649	regulation of interferon-gamma production	GO_BiologicalProcess-GOA_23.02.2017_10h01	0.0373022	1	5.05051	5	[Fadd, Hspd1, Il12rb2, Rasgrp1, Zfpm1]
GO:0060976	coronary vasculature development	GO_BiologicalProcess-GOA_23.02.2017_10h01	0.0376248	1	5.88235	4	[Arid2, Fuz, Megf8, Snx17]
GO:0042274	ribosomal small subunit biogenesis	GO_BiologicalProcess-GOA_23.02.2017_10h01	0.0376248	1	5.88235	4	[Kri1, Rps27l, Tbc1d1, Utp6]
GO:0008361	regulation of cell size	GO_BiologicalProcess-GOA_23.02.2017_10h01	0.0377096	1	4.16667	7	[Arhgap5, Atp7a, Cttn, Cyfip1, Megf8, Ntn1, Shtn1]
GO:0099518	vesicle cytoskeletal trafficking	GO_BiologicalProcess-GOA_23.02.2017_10h01	0.037814	1	7.5	3	[Ap3m1, Htt, Rasgrp1]
GO:1903573	negative regulation of response to endoplasmic reticulum stress	GO_BiologicalProcess-GOA_23.02.2017_10h01	0.037814	1	7.5	3	[Derl2, Nck2, Os9]
GO:0051985	negative regulation of chromosome segregation	GO_BiologicalProcess-GOA_23.02.2017_10h01	0.037814	1	7.5	3	[Atrx, Cep192, Zfp207]
GO:0046165	alcohol biosynthetic process	GO_BiologicalProcess-GOA_23.02.2017_10h01	0.0386923	1	5	5	[Erlin1, Impa2, Ipmk, Ptafr, Sc5d]
GO:0042035	regulation of cytokine biosynthetic process	GO_BiologicalProcess-GOA_23.02.2017_10h01	0.0401137	1	4.9505	5	[Errfi1, Glmn, Icosl, Ptafr, Zfpm1]
GO:0033116	endoplasmic reticulum-Golgi intermediate compartment membrane	GO_CellularComponent-GOA_23.02.2017_10h01	0.0402553	1	7.31707	3	[Lman1, Piezo1, Sppl3]
GO:0043596	nuclear replication fork	GO_CellularComponent-GOA_23.02.2017_10h01	0.0402553	1	7.31707	3	[Pola2, Xpa, Zranb3]
GO:0001098	basal transcription machinery binding	GO_MolecularFunction-GOA_23.02.2017_10h01	0.0402553	1	7.31707	3	[Cdc73, Elof1, Tcf4]
GO:0001099	basal RNA polymerase II transcription machinery binding	GO_MolecularFunction-GOA_23.02.2017_10h01	0.0402553	1	7.31707	3	[Cdc73, Elof1, Tcf4]
GO:0010950	positive regulation of endopeptidase activity	GO_BiologicalProcess-GOA_23.02.2017_10h01	0.0403452	1	4.44444	6	[Col4a3, Diablo, Fadd, Hspd1, Psmd14, Rps27l]
GO:0006479	protein methylation	GO_BiologicalProcess-GOA_23.02.2017_10h01	0.040856	1	4.09357	7	[Atrx, Dot1l, Ezh2, Mthfr, Pcmt1, Setd1b, Supt6]
GO:0008213	protein alkylation	GO_BiologicalProcess-GOA_23.02.2017_10h01	0.040856	1	4.09357	7	[Atrx, Dot1l, Ezh2, Mthfr, Pcmt1, Setd1b, Supt6]
GO:0071230	cellular response to amino acid stimulus	GO_BiologicalProcess-GOA_23.02.2017_10h01	0.0411757	1	5.71429	4	[Atp7a, Lamtor3, Slc38a9, Ubr1]
GO:0044106	cellular amine metabolic process	GO_BiologicalProcess-GOA_23.02.2017_10h01	0.0411757	1	5.71429	4	[Agmat, Atp7a, Ido2, Tdo2]
GO:0030203	glycosaminoglycan metabolic process	GO_BiologicalProcess-GOA_23.02.2017_10h01	0.0415665	1	4.90196	5	[Bgn, Chst13, Hs2st1, Itih4, Mki67]
GO:0051651	maintenance of location in cell	GO_BiologicalProcess-GOA_23.02.2017_10h01	0.0415665	1	4.90196	5	[Alb, Aspm, Epb41l2, Os9, Pkd1]
GO:0002821	positive regulation of adaptive immune response	GO_BiologicalProcess-GOA_23.02.2017_10h01	0.0415665	1	4.90196	5	[Fadd, Hspd1, Malt1, Mlh1, Tnfsf13]
GO:0031648	protein destabilization	GO_BiologicalProcess-GOA_23.02.2017_10h01	0.0427744	1	7.14286	3	[Ccdc88c, Cdc73, Htt]
GO:0046173	polyol biosynthetic process	GO_BiologicalProcess-GOA_23.02.2017_10h01	0.0427744	1	7.14286	3	[Impa2, Ipmk, Ptafr]
GO:0018024	histone-lysine N-methyltransferase activity	GO_MolecularFunction-GOA_23.02.2017_10h01	0.0427744	1	7.14286	3	[Dot1l, Ezh2, Setd1b]
GO:0032813	tumor necrosis factor receptor superfamily binding	GO_MolecularFunction-GOA_23.02.2017_10h01	0.0427744	1	7.14286	3	[Bex3, Fadd, Tnfsf13]
GO:0031227	intrinsic component of endoplasmic reticulum membrane	GO_CellularComponent-GOA_23.02.2017_10h01	0.0428319	1	4.37956	6	[Atf6, Derl2, Ktn1, Rrbp1, Sppl3, Tmem33]
GO:0006367	transcription initiation from RNA polymerase II promoter	GO_BiologicalProcess-GOA_23.02.2017_10h01	0.04302	1	5.6338	4	[Gtf2a1, Med16, Med24, Tcf4]
GO:0006029	proteoglycan metabolic process	GO_BiologicalProcess-GOA_23.02.2017_10h01	0.04302	1	5.6338	4	[Bgn, Chst13, Hs2st1, Man1c1]
GO:0034620	cellular response to unfolded protein	GO_BiologicalProcess-GOA_23.02.2017_10h01	0.04302	1	5.6338	4	[Atf6, Derl2, Nck2, Tmem33]
GO:0051304	chromosome separation	GO_BiologicalProcess-GOA_23.02.2017_10h01	0.04302	1	5.6338	4	[Cep192, Hecw2, Mlh1, Zfp207]
GO:0060349	bone morphogenesis	GO_BiologicalProcess-GOA_23.02.2017_10h01	0.0430506	1	4.85437	5	[Acp5, Cbs, Col10a1, Megf8, Phospho1]
GO:0016571	histone methylation	GO_BiologicalProcess-GOA_23.02.2017_10h01	0.0441106	1	4.34783	6	[Atrx, Dot1l, Ezh2, Mthfr, Setd1b, Supt6]
GO:0030027	lamellipodium	GO_CellularComponent-GOA_23.02.2017_10h01	0.0453102	1	4	7	[Ctnnd1, Cttn, Cyfip1, Parvb, Piezo1, Shtn1, Wasf3]
GO:0007435	salivary gland morphogenesis	GO_BiologicalProcess-GOA_23.02.2017_10h01	0.0453707	1	6.97674	3	[Btbd7, Ctnnd1, Lama5]
GO:0010770	positive regulation of cell morphogenesis involved in differentiation	GO_BiologicalProcess-GOA_23.02.2017_10h01	0.0454129	1	4.31655	6	[Cyfip1, Megf8, Ntn1, Plxnb2, Ptprd, Shtn1]
GO:1903828	negative regulation of cellular protein localization	GO_BiologicalProcess-GOA_23.02.2017_10h01	0.0454129	1	4.31655	6	[Astn2, Derl2, Dnaja1, Ei24, Os9, Pkd1]
GO:0002822	regulation of adaptive immune response based on somatic recombination of immune receptors built from immunoglobulin superfamily domains	GO_BiologicalProcess-GOA_23.02.2017_10h01	0.0454129	1	4.31655	6	[Fadd, Hspd1, Malt1, Mlh1, Supt6, Tnfsf13]
GO:0072686	mitotic spindle	GO_CellularComponent-GOA_23.02.2017_10h01	0.046846	1	5.47945	4	[Aspm, Cttn, Hecw2, Map10]
GO:2000045	regulation of G1/S transition of mitotic cell cycle	GO_BiologicalProcess-GOA_23.02.2017_10h01	0.0476926	1	4.71698	5	[Cdc73, Ctdsp1, Ezh2, Pkd1, Rps27l]
GO:0044380	protein localization to cytoskeleton	GO_BiologicalProcess-GOA_23.02.2017_10h01	0.0480433	1	6.81818	3	[Dctn2, Htt, Klhl21]
GO:0002762	negative regulation of myeloid leukocyte differentiation	GO_BiologicalProcess-GOA_23.02.2017_10h01	0.0480433	1	6.81818	3	[Inpp4b, Ubash3b, Zfpm1]
GO:0030071	regulation of mitotic metaphase/anaphase transition	GO_BiologicalProcess-GOA_23.02.2017_10h01	0.0480433	1	6.81818	3	[Cep192, Hecw2, Zfp207]
GO:0008360	regulation of cell shape	GO_BiologicalProcess-GOA_23.02.2017_10h01	0.0480887	1	4.25532	6	[Cyfip1, Epb41l2, Parvb, Phip, Plxnb2, Wasf3]
GO:0034766	negative regulation of ion transmembrane transport	GO_BiologicalProcess-GOA_23.02.2017_10h01	0.0488276	1	5.40541	4	[Atp7a, Gsto1, Hamp, Tcaf2]
GO:0008033	tRNA processing	GO_BiologicalProcess-GOA_23.02.2017_10h01	0.0493032	1	4.6729	5	[Ptcd1, Rpp21, Tarbp1, Trdmt1, Yrdc]
GO:0048675	axon extension	GO_BiologicalProcess-GOA_23.02.2017_10h01	0.0493032	1	4.6729	5	[Cttn, Cyfip1, Megf8, Ntn1, Shtn1]
